# Supplementary material for: The inter-trial and inter-session reliability of Theia3D-derived markerless gait analysis in tight versus loose clothing
Source: PeerJ. 2025 Jan 2;13:e18613. doi: 10.7717/peerj.18613 (PMC11700486; doi:10.7717/peerj.18613)
Supplement: Supplemental Information 1 [file peerj-13-18613-s001.xlsx]

## Sheet: ITE Tight
Pelvic Tilt	Pelvic Ob.	Pelvic Rot.	Hip Sagittal	Hip Frontal	Hip Trans.	Knee Sagittal	Knee Frontal	Knee Trans.	Ankle Sagittal	Ankle Frontal	Ankle Trans.
0.737652	0.533674	1.41785	1.04668	0.887886	1.70688	0.951687	0.33431	2.11937	0.890534	1.05865	0.852548
0.723986	0.549208	1.44724	1.04383	0.919122	1.71416	1.01171	0.326581	2.13795	0.926914	1.0493	0.813507
0.711108	0.574427	1.48114	1.05686	0.965019	1.71886	1.13837	0.337726	2.14771	1.00465	1.06795	0.793004
0.706226	0.607396	1.51004	1.08828	1.01798	1.71834	1.25367	0.367059	2.15133	1.13926	1.10788	0.816127
0.712607	0.645486	1.52442	1.13825	1.06946	1.72053	1.3418	0.406294	2.15854	1.31473	1.15073	0.887115
0.727409	0.684242	1.51982	1.20264	1.11139	1.73042	1.42901	0.448421	2.16921	1.48459	1.18058	0.982057
0.744069	0.716135	1.49797	1.27557	1.13614	1.74343	1.551	0.492444	2.16923	1.59459	1.18979	1.07135
0.754294	0.732871	1.46752	1.35317	1.13946	1.7485	1.72666	0.54215	2.14749	1.60904	1.17716	1.13308
0.752912	0.728279	1.44254	1.42979	1.12284	1.73621	1.94587	0.600931	2.10623	1.53384	1.14566	1.1566
0.74351	0.700597	1.43481	1.4991	1.09118	1.70721	2.17434	0.668031	2.05404	1.41832	1.09987	1.14778
0.738366	0.653807	1.44667	1.56111	1.04989	1.67309	2.37578	0.737433	1.99985	1.32443	1.05077	1.12211
0.749855	0.59776	1.47183	1.62496	1.00569	1.65162	2.53541	0.801432	1.95748	1.28468	1.02308	1.08975
0.77954	0.545098	1.50061	1.70216	0.965765	1.65566	2.6658	0.856958	1.94146	1.28955	1.04049	1.05471
0.815735	0.504916	1.5247	1.79522	0.933338	1.68408	2.79221	0.906212	1.94918	1.31346	1.09797	1.02323
0.845641	0.479639	1.53967	1.89624	0.90724	1.7217	2.93193	0.950638	1.96065	1.34066	1.16525	1.00392
0.865375	0.466815	1.54487	1.99385	0.884996	1.74896	3.08395	0.986609	1.96268	1.36884	1.21921	1.00392
0.877826	0.463476	1.54296	2.07842	0.864779	1.75617	3.23193	1.00957	1.96206	1.39909	1.25489	1.02106
0.887536	0.468197	1.5411	2.14434	0.846935	1.7492	3.3549	1.02082	1.97315	1.4273	1.27522	1.04264
0.898558	0.479352	1.54892	2.19011	0.833356	1.74281	3.43802	1.02472	2.00023	1.44551	1.28477	1.05971
0.910435	0.492041	1.57133	2.21689	0.823363	1.74469	3.47851	1.02018	2.03299	1.4501	1.28763	1.07168
0.917935	0.499011	1.60093	2.22506	0.812389	1.74716	3.4809	1.00002	2.06015	1.44551	1.28441	1.07511
0.919565	0.494822	1.62117	2.2123	0.794847	1.74182	3.44958	0.96004	2.08066	1.4394	1.27386	1.06563
0.920661	0.479431	1.61818	2.17856	0.768241	1.73357	3.38844	0.904323	2.10176	1.43862	1.2612	1.04558
0.924492	0.457789	1.58771	2.12924	0.734875	1.73223	3.30223	0.841635	2.13002	1.44236	1.26177	1.0199
0.928814	0.435891	1.53367	2.07226	0.700155	1.73871	3.19671	0.782344	2.16154	1.4413	1.28838	0.983731
0.933206	0.417952	1.46585	2.01712	0.668895	1.74597	3.07833	0.734528	2.18272	1.42581	1.33149	0.929282
0.941375	0.405872	1.39857	1.97224	0.642424	1.74681	2.95335	0.700737	2.17771	1.39407	1.36541	0.867662
0.955434	0.399728	1.34729	1.94194	0.620071	1.73413	2.82679	0.679153	2.13837	1.35163	1.37424	0.822724
0.972592	0.399531	1.3223	1.92344	0.603732	1.7023	2.7029	0.665737	2.074	1.30597	1.36656	0.805843
0.986224	0.406277	1.32457	1.90522	0.597768	1.65166	2.58365	0.654251	2.00861	1.25921	1.36428	0.806557
0.993102	0.420143	1.34715	1.87481	0.604678	1.59334	2.46636	0.637365	1.96651	1.20865	1.37381	0.809733
0.996214	0.43808	1.37924	1.82647	0.621403	1.54436	2.34457	0.61167	1.95718	1.15513	1.37525	0.81109
1.00022	0.454324	1.41154	1.76327	0.639958	1.51766	2.21369	0.581218	1.97144	1.10758	1.3462	0.811123
1.0043	0.463841	1.43981	1.6935	0.652728	1.51576	2.07616	0.553873	1.99093	1.07703	1.28673	0.809242
1.00377	0.464502	1.46304	1.62624	0.656594	1.52932	1.93955	0.534875	1.99966	1.06747	1.21488	0.805281
0.995247	0.457586	1.48032	1.56719	0.652518	1.54402	1.80974	0.524352	1.99406	1.0749	1.14768	0.797883
0.978379	0.447526	1.49018	1.51484	0.64457	1.55269	1.68705	0.522107	1.98711	1.09284	1.09568	0.786932
0.956469	0.439768	1.49163	1.46315	0.638835	1.55595	1.56901	0.528652	1.9979	1.1151	1.07039	0.775941
0.935486	0.438152	1.48499	1.40782	0.639367	1.55023	1.45364	0.538672	2.03248	1.13784	1.07768	0.768321
0.920624	0.443279	1.47365	1.3514	0.644409	1.53031	1.34149	0.542408	2.07354	1.16054	1.10626	0.763177
0.914288	0.452691	1.46449	1.30277	0.649632	1.4982	1.23599	0.5344	2.09236	1.18449	1.13041	0.759441
0.916731	0.462662	1.4631	1.27235	0.654532	1.46643	1.14147	0.516581	2.07489	1.2111	1.13055	0.755438
0.925205	0.469568	1.46784	1.26283	0.662188	1.45558	1.06165	0.494705	2.03358	1.24269	1.10657	0.751429
0.930086	0.470955	1.46936	1.26197	0.673807	1.47892	0.99831	0.47491	1.99342	1.27911	1.07437	0.754123
0.92015	0.466643	1.45887	1.25391	0.68695	1.52968	0.950944	0.461984	1.9712	1.31707	1.05407	0.768488
0.89089	0.45922	1.43745	1.23096	0.699108	1.5888	0.917918	0.456728	1.96666	1.35602	1.05393	0.789505
0.847286	0.453541	1.41677	1.19722	0.710597	1.64124	0.898842	0.45564	1.97037	1.40043	1.06731	0.810564
0.801657	0.453313	1.41191	1.16211	0.723473	1.6837	0.894464	0.455479	1.9786	1.45994	1.08427	0.829886
0.765807	0.457612	1.43179	1.13105	0.739586	1.7229	0.904143	0.458293	1.99689	1.5432	1.09706	0.845014
0.744299	0.462768	1.47438	1.10359	0.759905	1.76831	0.925108	0.470538	2.03203	1.65012	1.10298	0.8515
0.737499	0.467726	1.52939	1.07817	0.785957	1.81937	0.953756	0.494919	2.08286	1.77448	1.10264	0.847394
0.747612	0.475572	1.58476	1.06048	0.820564	1.86024	0.987362	0.525609	2.1395	1.9132	1.09727	0.833734
0.777235	0.489172	1.63152	1.06206	0.864775	1.87621	1.02459	0.555041	2.18799	2.06593	1.0895	0.819629
0.822456	0.50769	1.66568	1.08757	0.915595	1.86867	1.06474	0.58168	2.21842	2.2295	1.0825	0.82122
0.869032	0.52805	1.68819	1.1272	0.966362	1.85276	1.10746	0.611029	2.23083	2.39466	1.07954	0.837865
0.89717	0.545971	1.70161	1.16052	1.00764	1.84444	1.15382	0.651849	2.23162	2.54572	1.0884	0.858587
0.89489	0.556029	1.70577	1.17275	1.0297	1.84784	1.20664	0.710423	2.22484	2.66897	1.1197	0.884184
0.868688	0.554009	1.69863	1.17003	1.02719	1.85261	1.27064	0.788226	2.20714	2.76093	1.18317	0.915211
0.840688	0.539962	1.68087	1.17657	1.0035	1.8441	1.35147	0.883529	2.1686	2.8213	1.28464	0.939495
0.831649	0.51913	1.65744	1.21504	0.969974	1.81619	1.45275	0.991992	2.1012	2.8519	1.42416	0.945265
0.844114	0.498452	1.63542	1.28518	0.93711	1.77783	1.57334	1.10738	2.0086	2.85585	1.59251	0.936024
0.865701	0.481913	1.62141	1.3665	0.905975	1.7473	1.70574	1.22313	1.90891	2.82353	1.76826	0.933001
0.880511	0.470004	1.61982	1.43751	0.87093	1.73814	1.83536	1.334	1.82413	2.72045	1.92135	0.956514
0.873438	0.461765	1.63154	1.48951	0.831239	1.75152	1.94445	1.43649	1.76424	2.49573	2.03237	0.989721
0.838387	0.45621	1.65303	1.53071	0.796585	1.77611	2.01972	1.52708	1.72132	2.12519	2.1065	0.998981
0.789514	0.453154	1.67841	1.5783	0.78077	1.79757	2.05734	1.60302	1.6765	1.66886	2.16206	0.977793
0.755743	0.452961	1.70287	1.64131	0.78853	1.81172	2.06271	1.66376	1.6143	1.30282	2.21124	0.945146
0.755417	0.454376	1.72263	1.71289	0.80866	1.82495	2.04764	1.71252	1.53459	1.24106	2.25201	0.910068
0.781939	0.453883	1.73254	1.77731	0.8224	1.8432	2.02457	1.75582	1.45363	1.43058	2.26909	0.861129
0.815364	0.448512	1.72679	1.82199	0.817281	1.8625	2.00185	1.8006	1.39113	1.64006	2.24608	0.793155
0.840235	0.438886	1.70463	1.84131	0.793213	1.87191	1.98297	1.85259	1.35896	1.7572	2.1826	0.727287
0.854715	0.428845	1.67444	1.83257	0.759504	1.86599	1.9667	1.91586	1.35153	1.77495	2.08842	0.698418
0.865094	0.42177	1.6499	1.79404	0.727672	1.85146	1.94942	1.99065	1.34945	1.72683	1.9685	0.719777
0.874104	0.417989	1.64236	1.72902	0.707581	1.83788	1.92944	2.0679	1.34303	1.65071	1.82752	0.770184
0.877361	0.414807	1.65481	1.65153	0.704848	1.82638	1.90972	2.12828	1.34255	1.57481	1.68119	0.817438
0.870995	0.408823	1.67982	1.58234	0.717611	1.81543	1.89589	2.15232	1.36059	1.5188	1.55204	0.838615
0.859258	0.399777	1.70341	1.5375	0.73842	1.80866	1.89139	2.13297	1.39459	1.49485	1.46037	0.825847
0.853043	0.391626	1.71393	1.51947	0.759453	1.80799	1.89594	2.07862	1.43181	1.50421	1.41219	0.785224
0.86028	0.38911	1.70773	1.5163	0.775521	1.80832	1.90566	2.00701	1.46447	1.53926	1.38974	0.730535
0.877793	0.393767	1.68792	1.51033	0.784916	1.80503	1.91547	1.93507	1.49489	1.5819	1.36348	0.67807
0.894257	0.403659	1.66049	1.48705	0.789898	1.8003	1.92095	1.87196	1.52982	1.60691	1.32147	0.648054
0.899781	0.416316	1.63335	1.44076	0.794309	1.79844	1.9195	1.81951	1.57015	1.59397	1.28265	0.653509
0.894143	0.430878	1.61526	1.37744	0.800978	1.8012	1.91203	1.77632	1.60838	1.54414	1.27015	0.681597
0.883909	0.447623	1.6112	1.30977	0.812726	1.80992	1.90481	1.74203	1.64138	1.47957	1.28078	0.710679
0.87472	0.467307	1.61723	1.24974	0.832188	1.82586	1.90664	1.71651	1.67993	1.42654	1.29247	0.740239
0.864723	0.49041	1.62197	1.20247	0.85815	1.84617	1.92254	1.69307	1.73622	1.39786	1.28565	0.779133
0.849786	0.516224	1.6143	1.1686	0.884941	1.865	1.95023	1.65651	1.81279	1.39242	1.25535	0.819579
0.834377	0.542662	1.59008	1.15073	0.905857	1.87882	1.98267	1.59087	1.9067	1.40245	1.21107	0.844614
0.829177	0.567239	1.55411	1.15117	0.916392	1.88809	2.01301	1.48868	2.00874	1.41164	1.16679	0.851124
0.83815	0.587845	1.51697	1.1649	0.915549	1.89312	2.0374	1.3526	2.09986	1.40045	1.13471	0.845999
0.84994	0.602591	1.48983	1.18085	0.906838	1.89024	2.05395	1.19283	2.16259	1.36013	1.12624	0.834945
0.849089	0.61021	1.47998	1.19196	0.896356	1.87422	2.05865	1.02346	2.20385	1.29861	1.15172	0.827157
0.835487	0.61078	1.48713	1.2013	0.887693	1.84537	2.04329	0.858141	2.24407	1.23164	1.21662	0.83457
0.817762	0.60512	1.5037	1.21255	0.880874	1.81222	1.99739	0.707904	2.28882	1.17421	1.31246	0.867161
0.799041	0.594358	1.51963	1.22057	0.876021	1.78498	1.91076	0.582532	2.3231	1.13833	1.41084	0.924476
0.779048	0.57999	1.52819	1.21585	0.876308	1.76814	1.77486	0.490206	2.33417	1.12801	1.4838	0.987474
0.759962	0.564135	1.52722	1.19376	0.887494	1.76203	1.58752	0.43232	2.33144	1.13276	1.52706	1.03748
0.750147	0.548872	1.51729	1.1627	0.912391	1.76447	1.36384	0.402254	2.33665	1.13538	1.56449	1.07055
0.763196	0.534187	1.50146	1.14516	0.94627	1.76733	1.14747	0.39073	2.3584	1.12216	1.62357	1.0886
0.810947	0.517985	1.48331	1.16542	0.979281	1.75895	1.00792	0.388982	2.38417	1.08514	1.69803	1.09399
0.890866	0.499589	1.46695	1.22649	1.00475	1.73851	0.99033	0.392254	2.39258	1.03213	1.75008	1.10295

## Sheet: ISE Tight
Pelvic Tilt	Pelvic Ob.	Pelvic Rot.	Hip Sagittal	Hip Frontal	Hip Trans.	Knee Sagittal	Knee Frontal	Knee Trans.	Ankle Sagittal	Ankle Frontal	Ankle Trans.
1.11495	0.661865	2.63569	1.41681	1.50856	2.81743	1.32823	0.543995	3.13266	1.45709	1.60019	1.35419
1.10387	0.667241	2.68852	1.44068	1.57238	2.83639	1.42121	0.551385	3.16453	1.47913	1.61292	1.34956
1.10232	0.681929	2.74021	1.46424	1.63092	2.86731	1.56129	0.57138	3.1896	1.53392	1.6275	1.36632
1.11321	0.704195	2.78387	1.491	1.67387	2.9007	1.6825	0.603915	3.2082	1.64061	1.64539	1.41137
1.13894	0.730059	2.81182	1.52931	1.69458	2.92994	1.77681	0.646436	3.21882	1.79046	1.66556	1.48743
1.17733	0.75498	2.81825	1.58201	1.69207	2.95102	1.8701	0.696922	3.21546	1.93736	1.68478	1.58532
1.22187	0.774364	2.80144	1.6439	1.66918	2.96374	1.99476	0.756975	3.1918	2.02045	1.69881	1.68437
1.26665	0.783936	2.76501	1.7084	1.63028	2.96917	2.16666	0.830727	3.14807	1.99849	1.70558	1.76396
1.30767	0.780504	2.71687	1.77006	1.58029	2.96665	2.37382	0.919103	3.09266	1.87573	1.707	1.81655
1.34354	0.763517	2.66627	1.82438	1.52452	2.95639	2.58287	1.01613	3.03494	1.70507	1.70541	1.85096
1.37509	0.735799	2.62071	1.87075	1.46715	2.94294	2.76036	1.11059	2.97862	1.55973	1.70186	1.88051
1.40316	0.703663	2.58345	1.91546	1.41026	2.9357	2.89254	1.19229	2.92578	1.48652	1.70062	1.91004
1.42788	0.675006	2.55235	1.97059	1.35394	2.94311	2.99022	1.25864	2.87992	1.48073	1.70824	1.93703
1.4487	0.655153	2.52074	2.04659	1.29717	2.96366	3.07688	1.31338	2.8398	1.50922	1.72426	1.95757
1.46441	0.644818	2.48076	2.14466	1.24068	2.98309	3.17071	1.36034	2.79854	1.54406	1.73973	1.96958
1.47495	0.641446	2.42725	2.2552	1.18923	2.9831	3.27429	1.40062	2.75301	1.57266	1.74671	1.97213
1.48102	0.641943	2.35985	2.36309	1.14966	2.95376	3.37688	1.43434	2.71072	1.59278	1.74591	1.96427
1.48204	0.64434	2.28297	2.45476	1.12551	2.89876	3.46296	1.46238	2.6856	1.605	1.74619	1.94894
1.47617	0.647732	2.20444	2.52224	1.11295	2.83154	3.51988	1.48429	2.68529	1.6092	1.75594	1.93523
1.46101	0.651102	2.13221	2.5637	1.10299	2.76516	3.54241	1.49642	2.7031	1.60644	1.77676	1.93243
1.4349	0.653276	2.06887	2.58106	1.08863	2.70502	3.53113	1.49463	2.72679	1.59977	1.80755	1.94214
1.39879	0.653871	2.00934	2.57648	1.06863	2.65094	3.48873	1.47834	2.74971	1.59255	1.8473	1.95939
1.35688	0.653763	1.94525	2.55297	1.04615	2.60288	3.41965	1.45166	2.77043	1.58808	1.89165	1.97598
1.3158	0.654011	1.87222	2.51768	1.02577	2.56128	3.33007	1.42079	2.78973	1.58607	1.93418	1.98114
1.2824	0.65462	1.79393	2.48048	1.01111	2.52471	3.2264	1.39131	2.81031	1.58196	1.97108	1.96215
1.26266	0.654922	1.72243	2.45018	1.00366	2.49133	3.11397	1.36663	2.83617	1.57073	2.00142	1.91364
1.25962	0.654505	1.67458	2.4313	1.00206	2.46147	2.99661	1.34799	2.86921	1.54989	2.02612	1.84618
1.27158	0.653889	1.66472	2.423	1.00298	2.43697	2.87677	1.33375	2.90798	1.51933	2.0483	1.77631
1.29347	0.654944	1.69602	2.4203	1.00299	2.41968	2.75628	1.31893	2.95189	1.47993	2.07229	1.713
1.31979	0.660264	1.75891	2.41747	0.998967	2.41008	2.63618	1.29649	3.00243	1.43187	2.09745	1.65861
1.3476	0.671472	1.83863	2.41132	0.988116	2.4098	2.51558	1.25938	3.0588	1.37629	2.11344	1.61542
1.37605	0.687492	1.92212	2.40213	0.968554	2.42196	2.39294	1.20275	3.11425	1.31714	2.10682	1.58682
1.40382	0.704653	2.00045	2.39278	0.941175	2.44931	2.27026	1.12703	3.16035	1.26081	2.07515	1.57067
1.42696	0.718659	2.06892	2.38626	0.91119	2.48934	2.15488	1.03956	3.19116	1.21422	2.02948	1.55689
1.4426	0.726549	2.12615	2.38393	0.886678	2.53292	2.05364	0.952374	3.20298	1.18306	1.97933	1.53068
1.45293	0.72732	2.17247	2.38606	0.873689	2.57006	1.96638	0.876875	3.19743	1.17024	1.92638	1.48041
1.46243	0.722088	2.21024	2.39131	0.873095	2.59693	1.88719	0.820045	3.18448	1.17492	1.87719	1.41046
1.47461	0.714456	2.24416	2.39755	0.882414	2.61744	1.81108	0.783768	3.17753	1.19363	1.84932	1.34397
1.48978	0.710359	2.27833	2.40231	0.898739	2.63666	1.73789	0.764422	3.18314	1.22347	1.85604	1.30566
1.50437	0.71541	2.31356	2.40202	0.91914	2.65443	1.67062	0.755072	3.19586	1.26326	1.89053	1.29783
1.51302	0.731482	2.34778	2.39338	0.940755	2.66442	1.61178	0.75052	3.20387	1.31044	1.93229	1.30349
1.51232	0.755662	2.3779	2.37653	0.961353	2.65895	1.56099	0.749417	3.20131	1.35911	1.96591	1.30805
1.50146	0.781951	2.40113	2.35423	0.979063	2.63722	1.51663	0.751919	3.19333	1.40373	1.99208	1.30941
1.4809	0.804225	2.41614	2.32875	0.991631	2.60516	1.47914	0.757244	3.19014	1.44299	2.02059	1.31385
1.45431	0.818343	2.42463	2.30336	0.996979	2.56981	1.45206	0.763995	3.19769	1.4811	2.0571	1.32548
1.42697	0.822825	2.43182	2.28088	0.99546	2.53672	1.43917	0.771515	3.21149	1.52531	2.0978	1.34205
1.40291	0.818554	2.4436	2.26226	0.991619	2.50877	1.44168	0.780672	3.21946	1.5812	2.13528	1.36278
1.38514	0.80799	2.4627	2.24778	0.992914	2.48598	1.45811	0.79333	3.2126	1.65287	2.16437	1.39186
1.3752	0.794237	2.48757	2.23702	1.0059	2.46951	1.48555	0.810624	3.19228	1.74377	2.17887	1.43281
1.37269	0.780869	2.51446	2.22888	1.03328	2.46427	1.52166	0.832094	3.1672	1.85654	2.17037	1.48064
1.37604	0.771818	2.5402	2.2214	1.07421	2.4741	1.56573	0.856732	3.14735	1.99376	2.13373	1.52341
1.38616	0.769611	2.56307	2.21646	1.12602	2.49621	1.61868	0.884974	3.13899	2.15912	2.07458	1.54968
1.4086	0.773527	2.58201	2.22101	1.18392	2.5243	1.6819	0.920459	3.14094	2.35319	2.01027	1.55536
1.44953	0.781093	2.59579	2.24191	1.24132	2.5541	1.75657	0.969678	3.1467	2.57087	1.96144	1.5446
1.50681	0.79066	2.60223	2.27929	1.291	2.58529	1.84389	1.03993	3.15149	2.80092	1.94495	1.52253
1.56526	0.801336	2.59745	2.3237	1.32671	2.61924	1.94588	1.13681	3.15516	3.02666	1.97072	1.49547
1.60492	0.81117	2.57624	2.36182	1.34456	2.65592	2.06398	1.26174	3.15982	3.23022	2.03845	1.47226
1.61463	0.816957	2.53534	2.38651	1.34372	2.69283	2.19685	1.4118	3.1662	3.39664	2.13858	1.45459
1.60085	0.816401	2.47717	2.40337	1.32742	2.72711	2.33925	1.58137	3.17025	3.51249	2.25635	1.43327
1.58381	0.809721	2.41046	2.42646	1.30276	2.75616	2.48324	1.76181	3.1615	3.5687	2.37667	1.40392
1.58412	0.798948	2.34625	2.46626	1.2769	2.77739	2.61999	1.94143	3.12672	3.56073	2.48876	1.37304
1.60999	0.786317	2.29257	2.52222	1.25273	2.78948	2.74218	2.10794	3.05857	3.47971	2.5863	1.3516
1.65495	0.773072	2.2522	2.58649	1.2289	2.7932	2.84451	2.25199	2.9618	3.30808	2.66254	1.34672
1.7047	0.759428	2.22425	2.6531	1.20413	2.78952	2.92207	2.3692	2.84747	3.03151	2.712	1.34799
1.74686	0.744761	2.20541	2.72247	1.17969	2.77718	2.96912	2.45979	2.72202	2.67599	2.73923	1.34037
1.77575	0.727921	2.19086	2.7951	1.15823	2.75694	2.97949	2.52842	2.58524	2.34269	2.75848	1.32494
1.79007	0.708424	2.17598	2.8619	1.1423	2.7367	2.9487	2.58232	2.43506	2.16619	2.77954	1.31138
1.79039	0.687215	2.15728	2.90821	1.13289	2.72477	2.8779	2.6267	2.27467	2.17857	2.79711	1.29718
1.77751	0.666014	2.13189	2.92145	1.12719	2.71911	2.77527	2.66149	2.11825	2.27006	2.79323	1.27001
1.75178	0.645703	2.09658	2.89617	1.11916	2.70902	2.654	2.68425	1.98606	2.32511	2.75218	1.23298
1.71673	0.625733	2.04921	2.83782	1.10356	2.68668	2.52923	2.69545	1.89247	2.30232	2.67539	1.21274
1.68048	0.605112	1.99219	2.75884	1.07866	2.65481	2.41484	2.69955	1.83829	2.21343	2.57796	1.2308
1.65217	0.583666	1.93412	2.67195	1.04556	2.62433	2.32097	2.70154	1.81177	2.0882	2.47464	1.27645
1.63541	0.563257	1.88749	2.58528	1.00737	2.60589	2.25424	2.7021	1.79861	1.95666	2.37154	1.31997
1.62573	0.547268	1.86209	2.50361	0.968367	2.6022	2.22012	2.69593	1.78869	1.84497	2.27034	1.34125
1.61633	0.53818	1.85671	2.43132	0.932931	2.60904	2.22266	2.67635	1.78068	1.77428	2.17579	1.33972
1.60561	0.536472	1.85881	2.37138	0.905735	2.61986	2.26107	2.64218	1.78339	1.75493	2.09662	1.32706
1.5958	0.541441	1.85545	2.3201	0.890106	2.62697	2.32787	2.6002	1.80545	1.78316	2.03735	1.31409
1.58676	0.551779	1.84357	2.26583	0.885114	2.62485	2.40985	2.56204	1.84644	1.84664	1.99271	1.29907
1.57575	0.565555	1.82903	2.19831	0.886125	2.61621	2.49242	2.53633	1.90019	1.92535	1.95444	1.27115
1.56237	0.580008	1.81995	2.11863	0.888176	2.61034	2.56478	2.51929	1.9663	1.99308	1.92017	1.22973
1.54858	0.59213	1.82327	2.03742	0.887985	2.61597	2.62313	2.49571	2.04942	2.02819	1.89262	1.19186
1.53471	0.600165	1.84535	1.96487	0.885269	2.63768	2.67127	2.45118	2.14542	2.0263	1.86822	1.17831
1.52099	0.605041	1.89136	1.90559	0.884238	2.67721	2.71873	2.38278	2.24212	1.99829	1.83494	1.19944
1.50927	0.610603	1.96067	1.85926	0.891708	2.73333	2.77594	2.29748	2.33326	1.95854	1.78739	1.24924
1.50033	0.621233	2.04451	1.82241	0.911622	2.80009	2.84855	2.20125	2.42454	1.91514	1.73381	1.31093
1.494	0.637821	2.13041	1.79423	0.941595	2.87021	2.93422	2.09396	2.53095	1.86871	1.68909	1.3685
1.49112	0.656782	2.20874	1.77925	0.975087	2.93785	3.0232	1.97121	2.66686	1.81663	1.66478	1.40758
1.49497	0.673801	2.27538	1.78577	1.00648	2.99724	3.10239	1.82866	2.82572	1.75551	1.65769	1.41954
1.50762	0.687383	2.33065	1.81683	1.03376	3.04139	3.15951	1.66507	2.98048	1.68438	1.65425	1.40496
1.52488	0.698378	2.37734	1.86145	1.05841	3.06465	3.1841	1.48277	3.10546	1.60945	1.64733	1.37112
1.53774	0.70802	2.41852	1.90103	1.08342	3.06686	3.16604	1.28734	3.19473	1.54209	1.64359	1.32927
1.54107	0.71704	2.45559	1.92346	1.11134	3.05352	3.09433	1.08825	3.25429	1.48881	1.65293	1.29483
1.53419	0.725374	2.48773	1.92515	1.14412	3.03134	2.95824	0.900028	3.28476	1.44645	1.67409	1.28918
1.51598	0.732305	2.51229	1.90522	1.18323	3.00268	2.75075	0.740794	3.28083	1.40839	1.69669	1.32954
1.48591	0.736799	2.52647	1.86413	1.22974	2.96601	2.47275	0.627289	3.24452	1.37231	1.71991	1.40854
1.44677	0.73885	2.52948	1.80586	1.28427	2.92048	2.1378	0.566265	3.19223	1.33922	1.7596	1.49674
1.40694	0.740584	2.52383	1.74	1.34673	2.8668	1.77939	0.547528	3.14551	1.30791	1.83175	1.56425
1.37714	0.745096	2.51555	1.68158	1.41576	2.80618	1.45943	0.550048	3.11664	1.27228	1.93145	1.5944
1.36663	0.75432	2.51263	1.64716	1.48759	2.74335	1.26422	0.55676	3.10738	1.22667	2.03319	1.59008
1.38127	0.76789	2.52189	1.64713	1.55615	2.69324	1.24648	0.562249	3.11951	1.18309	2.11002	1.57647

## Sheet: ITE Loose
Pelvic Tilt	Pelvic Ob.	Pelvic Rot.	Hip Sagittal	Hip Frontal	Hip Trans.	Knee Sagittal	Knee Frontal	Knee Trans.	Ankle Sagittal	Ankle Frontal	Ankle Trans.
0.83732	0.53253	1.58253	0.996725	1.1235	1.67762	1.22127	0.489087	2.07542	1.18205	1.37307	1.24974
0.839309	0.526982	1.60259	1.01392	1.15582	1.64033	1.32975	0.463859	2.05414	1.19611	1.36909	1.27786
0.828525	0.531142	1.61494	1.03149	1.19077	1.60688	1.42596	0.45001	2.01115	1.27131	1.34503	1.33002
0.819144	0.544638	1.61241	1.05416	1.22662	1.5947	1.50441	0.452331	1.96184	1.4034	1.31235	1.42356
0.820665	0.563163	1.59381	1.08338	1.25648	1.60939	1.56884	0.468241	1.92758	1.54693	1.28559	1.56172
0.83171	0.579757	1.56566	1.1189	1.27136	1.63723	1.62742	0.494556	1.9174	1.6339	1.27373	1.71773
0.846875	0.587859	1.53873	1.16045	1.26453	1.65341	1.69184	0.532388	1.92345	1.61401	1.2782	1.8468
0.861363	0.585206	1.52271	1.20491	1.23584	1.64827	1.77114	0.585028	1.93373	1.49562	1.29609	1.92293
0.872816	0.575699	1.52231	1.24632	1.19182	1.63584	1.86348	0.648962	1.9418	1.36494	1.31782	1.95468
0.882263	0.566133	1.53861	1.28396	1.14047	1.62899	1.95343	0.710354	1.94481	1.33767	1.32819	1.96921
0.893683	0.561625	1.57264	1.32295	1.08828	1.6265	2.01776	0.755251	1.93787	1.43022	1.32601	1.98068
0.908828	0.563345	1.62228	1.36395	1.04113	1.62665	2.03756	0.777809	1.91872	1.55206	1.323	1.98135
0.923564	0.568512	1.67915	1.40128	1.00374	1.63727	2.00883	0.786592	1.89413	1.63242	1.32297	1.96414
0.93424	0.572309	1.73154	1.43074	0.977382	1.66462	1.94425	0.798857	1.87419	1.65996	1.31964	1.94154
0.938646	0.570453	1.77121	1.45168	0.95924	1.70167	1.86727	0.824676	1.86529	1.65154	1.3081	1.92531
0.93289	0.561192	1.7943	1.46585	0.944058	1.73825	1.80215	0.868255	1.86939	1.61944	1.29156	1.90717
0.91591	0.546756	1.80005	1.47749	0.927825	1.77407	1.76507	0.937527	1.87902	1.56382	1.28424	1.88417
0.893645	0.532694	1.79074	1.49196	0.91148	1.81145	1.76021	1.03221	1.87501	1.48357	1.29528	1.8668
0.878251	0.52356	1.77027	1.51193	0.898758	1.84507	1.78063	1.13001	1.84394	1.38561	1.31057	1.85327
0.880876	0.518716	1.74383	1.53699	0.891773	1.86411	1.81217	1.19889	1.79655	1.28436	1.30961	1.82332
0.901361	0.512686	1.71603	1.56118	0.888804	1.8602	1.8396	1.2193	1.7648	1.19579	1.29286	1.76798
0.925457	0.501089	1.68797	1.57206	0.885587	1.83472	1.85279	1.19309	1.77629	1.12817	1.27622	1.70606
0.933699	0.485606	1.65907	1.55993	0.878635	1.79975	1.8503	1.13849	1.83373	1.07874	1.26825	1.6592
0.915306	0.473487	1.62897	1.52877	0.867951	1.76753	1.83912	1.07838	1.91685	1.04004	1.26608	1.62266
0.876041	0.471193	1.59806	1.49614	0.857316	1.74136	1.83007	1.03063	1.99344	1.00666	1.26667	1.58046
0.834861	0.478606	1.56972	1.48469	0.851854	1.72177	1.83266	1.00225	2.03466	0.983493	1.2699	1.53651
0.812216	0.489464	1.55045	1.51096	0.853212	1.71243	1.85063	0.987883	2.025	0.980934	1.27414	1.50593
0.816937	0.495811	1.54357	1.57512	0.857149	1.7132	1.88021	0.974557	1.96783	0.997918	1.2848	1.48446
0.83988	0.493331	1.544	1.6611	0.858273	1.71309	1.9132	0.953022	1.88659	1.01989	1.32073	1.44545
0.861612	0.48553	1.54289	1.74579	0.857181	1.69964	1.94028	0.925627	1.81504	1.03113	1.39014	1.36514
0.866268	0.482509	1.53604	1.8058	0.859284	1.67204	1.95092	0.90153	1.77932	1.02385	1.47166	1.24273
0.850088	0.491806	1.52557	1.82364	0.866076	1.64463	1.93686	0.88482	1.78123	1.00027	1.53203	1.10901
0.82091	0.510191	1.51509	1.79714	0.871697	1.63778	1.90054	0.871349	1.80388	0.973124	1.54947	1.01012
0.788367	0.526328	1.50422	1.73801	0.868907	1.66367	1.85409	0.856164	1.84695	0.959403	1.5237	0.96526
0.754389	0.531832	1.48909	1.66214	0.855262	1.71892	1.80771	0.841015	1.94047	0.966061	1.48203	0.951364
0.717524	0.528156	1.46793	1.58342	0.833647	1.78658	1.76363	0.831755	2.09913	0.984838	1.45826	0.947611
0.685805	0.522668	1.44589	1.51734	0.809751	1.84245	1.72086	0.827029	2.26662	1.00445	1.45023	0.963671
0.676345	0.521068	1.4337	1.4805	0.789484	1.86393	1.6781	0.816645	2.3509	1.02186	1.42448	1.01042
0.69514	0.524871	1.44022	1.47634	0.778012	1.84777	1.6358	0.794804	2.32234	1.0412	1.36877	1.06568
0.729022	0.533424	1.46539	1.4913	0.780192	1.81644	1.60233	0.767167	2.24149	1.06923	1.30436	1.09503
0.756374	0.544077	1.50116	1.50187	0.795732	1.79439	1.58855	0.739957	2.17958	1.11146	1.24559	1.0887
0.763038	0.551499	1.53812	1.48943	0.814584	1.78644	1.59359	0.708842	2.15053	1.16783	1.18634	1.06773
0.750463	0.550229	1.56956	1.45136	0.824805	1.79101	1.60287	0.667763	2.1397	1.23232	1.12446	1.05662
0.730065	0.539038	1.59169	1.39905	0.82358	1.81195	1.59928	0.621853	2.14137	1.29752	1.0697	1.05864
0.715963	0.521575	1.60356	1.34845	0.817063	1.84755	1.57377	0.586039	2.15002	1.35901	1.03126	1.06308
0.721884	0.503904	1.60891	1.31391	0.811764	1.8837	1.52864	0.570509	2.15272	1.41902	1.01159	1.06306
0.751447	0.492538	1.61512	1.30305	0.810853	1.90453	1.4751	0.572836	2.1391	1.48478	1.01208	1.0603
0.790776	0.491825	1.62567	1.31085	0.815545	1.90802	1.42588	0.58654	2.10942	1.56472	1.033	1.06032
0.820781	0.500082	1.6361	1.32489	0.823468	1.90301	1.38828	0.604543	2.07093	1.66545	1.06424	1.06923
0.831774	0.510935	1.63938	1.33384	0.828991	1.89582	1.36286	0.618798	2.02989	1.78546	1.09038	1.09512
0.824283	0.518916	1.63261	1.33103	0.829154	1.88711	1.34661	0.626047	1.98889	1.91379	1.10616	1.14182
0.80484	0.523218	1.61842	1.31607	0.82525	1.87709	1.33574	0.629799	1.94848	2.03477	1.12143	1.19981
0.782512	0.527683	1.60158	1.29547	0.820351	1.86976	1.32771	0.633802	1.91097	2.13556	1.15044	1.24974
0.764564	0.537387	1.5875	1.2773	0.818923	1.87011	1.32307	0.63782	1.88327	2.21053	1.19893	1.27068
0.756192	0.553081	1.58258	1.26842	0.826753	1.87901	1.32741	0.642319	1.87488	2.25984	1.26121	1.25048
0.758409	0.569344	1.59204	1.27045	0.84863	1.89489	1.35208	0.654304	1.88848	2.28887	1.32632	1.1976
0.762035	0.579132	1.61474	1.27996	0.884483	1.91798	1.41005	0.684301	1.91027	2.30384	1.38543	1.13229
0.756235	0.580177	1.64241	1.29508	0.929941	1.94792	1.50637	0.738386	1.92416	2.30754	1.44032	1.07104
0.744511	0.576686	1.66799	1.32005	0.981543	1.98353	1.63383	0.816317	1.93644	2.30506	1.49992	1.02378
0.742106	0.574387	1.69201	1.36267	1.0379	2.02251	1.77756	0.916239	1.96795	2.30653	1.56848	0.995505
0.762181	0.5752	1.71762	1.42711	1.09386	2.05833	1.92032	1.03751	2.02011	2.31735	1.64628	0.98472
0.804707	0.576421	1.74484	1.51201	1.13757	2.083	2.04904	1.17597	2.06765	2.32524	1.73503	0.983391
0.854064	0.573158	1.77098	1.61115	1.15558	2.09329	2.15798	1.31837	2.08113	2.29806	1.82794	0.98741
0.890705	0.56251	1.79389	1.71802	1.14181	2.09154	2.24662	1.44494	2.04196	2.20372	1.90065	0.997686
0.900936	0.546483	1.81316	1.82525	1.10353	2.08162	2.31436	1.53849	1.94338	2.03908	1.92761	1.01793
0.883692	0.530405	1.82817	1.92674	1.05792	2.06345	2.3566	1.59126	1.79328	1.84887	1.90877	1.05366
0.854669	0.517823	1.83614	2.01921	1.01877	2.03245	2.36447	1.60909	1.6204	1.71848	1.87242	1.10306
0.840076	0.50814	1.83216	2.09829	0.984556	1.98672	2.32978	1.61165	1.46597	1.713	1.84952	1.15082
0.861254	0.500398	1.81209	2.15998	0.944289	1.93416	2.25246	1.6232	1.36448	1.80705	1.85332	1.17247
0.916297	0.496212	1.77669	2.20111	0.894038	1.88683	2.14213	1.65699	1.32636	1.91897	1.87757	1.15535
0.979116	0.496829	1.73435	2.21681	0.841314	1.85275	2.01441	1.70939	1.33663	1.98624	1.90563	1.1144
1.02198	0.50031	1.69815	2.20397	0.795917	1.83496	1.88692	1.76939	1.36784	1.98735	1.92245	1.07598
1.03152	0.503465	1.67496	2.16541	0.763479	1.8299	1.77462	1.82712	1.39606	1.92818	1.91915	1.04839
1.01247	0.505594	1.65981	2.10892	0.747386	1.82458	1.68463	1.87206	1.41358	1.82653	1.89251	1.02333
0.982665	0.508397	1.64429	2.04353	0.749617	1.80769	1.61634	1.89594	1.43774	1.70961	1.85172	0.988952
0.956216	0.513674	1.62748	1.97196	0.7674	1.78698	1.56711	1.89959	1.48216	1.61477	1.80504	0.943191
0.934369	0.521766	1.61543	1.89092	0.791787	1.78403	1.53624	1.8931	1.52001	1.56945	1.74818	0.903697
0.910378	0.532117	1.61277	1.79798	0.812462	1.80736	1.52489	1.88375	1.50431	1.56903	1.67272	0.892551
0.879195	0.544	1.61837	1.69718	0.823518	1.84572	1.53555	1.8694	1.42673	1.58466	1.57818	0.908365
0.844232	0.55582	1.62841	1.60032	0.824791	1.88897	1.57006	1.84737	1.34352	1.58734	1.47932	0.928367
0.817136	0.564876	1.64175	1.52295	0.81975	1.93826	1.6281	1.8195	1.32482	1.56691	1.39583	0.945221
0.810946	0.568559	1.65936	1.47825	0.812521	1.99268	1.70754	1.78277	1.38247	1.53039	1.34004	0.984105
0.829795	0.566661	1.68045	1.46888	0.806451	2.0362	1.80319	1.72467	1.47499	1.48677	1.31732	1.0623
0.863072	0.562301	1.70028	1.48227	0.804539	2.0494	1.90619	1.63765	1.56155	1.44133	1.32488	1.14705
0.893698	0.559434	1.71387	1.497	0.810002	2.03826	2.00828	1.53923	1.62562	1.4012	1.34795	1.20479
0.911505	0.559576	1.72145	1.49438	0.824865	2.03566	2.10709	1.46633	1.66957	1.37463	1.36627	1.24652
0.911784	0.562207	1.72573	1.4628	0.848024	2.06244	2.20538	1.43953	1.7067	1.35751	1.37226	1.28482
0.89283	0.56708	1.72478	1.39833	0.875887	2.10303	2.30405	1.43836	1.75076	1.33459	1.37671	1.30872
0.860518	0.574391	1.71272	1.30867	0.903782	2.13065	2.39623	1.42341	1.80335	1.29555	1.38937	1.31094
0.828786	0.583425	1.68897	1.21482	0.926993	2.14023	2.4682	1.37116	1.86344	1.25011	1.40766	1.30095
0.811559	0.592104	1.66364	1.1417	0.941744	2.14182	2.50576	1.28088	1.9387	1.22132	1.41576	1.30028
0.813351	0.598316	1.64873	1.10257	0.946763	2.14032	2.50105	1.16692	2.03408	1.22214	1.39769	1.33153
0.828124	0.602578	1.64731	1.09184	0.943777	2.13393	2.45237	1.05233	2.14014	1.24318	1.36992	1.39485
0.847095	0.607874	1.65481	1.09534	0.936365	2.12101	2.35777	0.958272	2.23625	1.2642	1.38345	1.45934
0.862938	0.617179	1.66521	1.09988	0.928842	2.10408	2.2118	0.892154	2.29482	1.26983	1.46519	1.49554
0.870184	0.633219	1.6756	1.09622	0.926983	2.08662	2.00898	0.848291	2.30142	1.2549	1.58158	1.5041
0.865856	0.656108	1.68728	1.08292	0.936874	2.06623	1.7515	0.820389	2.27506	1.2229	1.68459	1.51199
0.856683	0.681392	1.70281	1.07348	0.961897	2.03162	1.45628	0.805777	2.24828	1.18269	1.75207	1.53971
0.847444	0.701882	1.72142	1.08359	0.998781	1.97212	1.16649	0.795893	2.24228	1.14367	1.80539	1.58192
0.830993	0.712206	1.73704	1.11446	1.03702	1.89017	0.963368	0.776568	2.27745	1.11412	1.89007	1.61953
0.804164	0.711506	1.74082	1.15879	1.06397	1.80183	0.924228	0.743188	2.37831	1.10332	2.01494	1.63514

## Sheet: ISE Loose
Pelvic Tilt	Pelvic Ob.	Pelvic Rot.	Hip Sagittal	Hip Frontal	Hip Trans.	Knee Sagittal	Knee Frontal	Knee Trans.	Ankle Sagittal	Ankle Frontal	Ankle Trans.
1.36369	0.852544	2.55905	1.57088	1.76802	2.30633	1.73898	0.751444	2.60186	1.75088	1.89311	1.58633
1.35298	0.86504	2.57726	1.58694	1.77881	2.27511	1.83948	0.764555	2.59893	1.77904	1.97741	1.60638
1.34425	0.879833	2.58067	1.62115	1.79299	2.23869	1.90783	0.807143	2.61257	1.86114	2.05451	1.66787
1.34262	0.893872	2.56948	1.67033	1.80719	2.21207	1.94438	0.86464	2.64058	1.99636	2.10411	1.76376
1.34926	0.902712	2.54611	1.72655	1.81418	2.20561	1.96496	0.91732	2.67938	2.14959	2.11915	1.86797
1.3618	0.903518	2.51615	1.78325	1.80717	2.21911	1.989	0.95589	2.72205	2.26104	2.10854	1.95754
1.37625	0.897465	2.48712	1.83684	1.78293	2.24121	2.03515	0.985862	2.75949	2.27774	2.09152	2.02834
1.38721	0.889165	2.4651	1.88386	1.74226	2.26189	2.11722	1.02067	2.78603	2.18533	2.08242	2.09223
1.39016	0.883885	2.45231	1.92187	1.68931	2.28409	2.2365	1.07077	2.80283	2.02579	2.07749	2.16043
1.38619	0.885298	2.44792	1.95417	1.62959	2.31358	2.37654	1.13564	2.81564	1.8866	2.06397	2.23217
1.38262	0.894367	2.45109	1.99049	1.56904	2.34647	2.50878	1.20573	2.82704	1.84419	2.03687	2.29693
1.3885	0.908885	2.46178	2.04077	1.51502	2.37382	2.60704	1.27165	2.83134	1.89848	1.99632	2.34854
1.40834	0.924421	2.47993	2.10748	1.47491	2.39208	2.65995	1.33082	2.81995	1.98428	1.94371	2.39841
1.44011	0.936818	2.50472	2.18024	1.45176	2.40648	2.67484	1.38486	2.79224	2.0381	1.8894	2.46642
1.4758	0.944549	2.53434	2.23973	1.44144	2.42399	2.67179	1.43098	2.75757	2.03567	1.85187	2.54919
1.50772	0.948365	2.56526	2.27039	1.43533	2.44312	2.67145	1.46237	2.7262	1.98703	1.84508	2.61741
1.53472	0.949316	2.59203	2.27306	1.42706	2.45412	2.68605	1.47902	2.69995	1.9161	1.87278	2.64915
1.56034	0.946816	2.60847	2.26363	1.41619	2.44656	2.71865	1.48958	2.67104	1.84323	1.92638	2.64617
1.5859	0.938377	2.60911	2.25884	1.40498	2.41731	2.76512	1.50032	2.63223	1.77932	1.9858	2.62047
1.60688	0.921908	2.5912	2.26368	1.39491	2.37311	2.81434	1.50759	2.58603	1.72719	2.03121	2.58063
1.61656	0.897502	2.55541	2.27133	1.38662	2.32553	2.85253	1.50345	2.54071	1.68532	2.0529	2.53314
1.6107	0.867949	2.50548	2.27419	1.38132	2.28783	2.87192	1.48669	2.50387	1.64993	2.04907	2.48443
1.59019	0.838588	2.44703	2.27347	1.38094	2.27389	2.87576	1.46536	2.48555	1.61675	2.02279	2.43478
1.5619	0.815534	2.38585	2.27945	1.38726	2.29165	2.87575	1.44954	2.49635	1.58421	1.98495	2.37842
1.53554	0.802986	2.32702	2.30305	1.40039	2.33475	2.88409	1.44661	2.53323	1.55556	1.95128	2.3147
1.51628	0.801539	2.27625	2.34671	1.41785	2.38645	2.90601	1.46099	2.57725	1.53911	1.93148	2.25068
1.50394	0.80846	2.24057	2.40757	1.43494	2.43093	2.93767	1.49307	2.60854	1.543	1.92118	2.18966
1.4965	0.819397	2.2251	2.48142	1.44723	2.46052	2.96952	1.53847	2.61982	1.56607	1.90725	2.12173
1.49223	0.831137	2.2296	2.56103	1.45378	2.47661	2.99219	1.59021	2.61936	1.59709	1.88299	2.03001
1.4893	0.844485	2.24892	2.63383	1.45828	2.48484	3.00026	1.64015	2.62542	1.62199	1.85837	1.90971
1.48269	0.863044	2.2757	2.67931	1.46578	2.48858	2.99081	1.67892	2.651	1.63116	1.85231	1.77869
1.46555	0.888204	2.30262	2.67572	1.47756	2.48891	2.96017	1.69712	2.69049	1.6243	1.86973	1.6676
1.43518	0.915801	2.32332	2.61306	1.48867	2.48749	2.90385	1.6885	2.72681	1.612	1.89448	1.59544
1.39669	0.937773	2.33329	2.50021	1.49001	2.49017	2.82002	1.65194	2.75495	1.60952	1.90995	1.55351
1.35822	0.94736	2.33079	2.36107	1.47308	2.50632	2.71303	1.59169	2.79008	1.62524	1.91678	1.52058
1.32384	0.943554	2.31672	2.22135	1.43514	2.53989	2.59359	1.51679	2.84427	1.65397	1.92356	1.48672
1.29779	0.931719	2.29417	2.10159	1.38183	2.5833	2.47541	1.43715	2.9015	1.68402	1.92403	1.46187
1.2904	0.921021	2.26951	2.01741	1.32475	2.62249	2.36931	1.36045	2.93061	1.70886	1.89771	1.46202
1.30856	0.91979	2.25315	1.9746	1.27612	2.64957	2.28028	1.29443	2.92639	1.72954	1.83775	1.49014
1.34529	0.93084	2.25529	1.96607	1.24497	2.66943	2.21056	1.24739	2.91734	1.75012	1.76558	1.5322
1.38243	0.950716	2.27755	1.97412	1.23378	2.69112	2.16106	1.22205	2.9243	1.77351	1.71263	1.57153
1.40359	0.973477	2.31109	1.97931	1.23784	2.71687	2.12873	1.21129	2.93624	1.79962	1.69553	1.60225
1.40479	0.995083	2.34321	1.97135	1.24968	2.74276	2.10631	1.20375	2.93425	1.82762	1.7082	1.62654
1.39432	1.01486	2.36618	1.95088	1.26486	2.76413	2.08584	1.1929	2.91427	1.85893	1.73235	1.64542
1.38401	1.03305	2.38068	1.9215	1.28279	2.77801	2.06116	1.17961	2.88268	1.89527	1.75544	1.65754
1.38406	1.04825	2.39308	1.88777	1.3029	2.78099	2.02865	1.16792	2.84693	1.93678	1.7781	1.66274
1.40053	1.05877	2.40958	1.85661	1.32364	2.7702	1.9875	1.16125	2.81226	1.98479	1.80385	1.66396
1.42923	1.06525	2.43063	1.83194	1.34533	2.74879	1.93921	1.16163	2.78003	2.04414	1.82701	1.66501
1.45891	1.06971	2.45101	1.81383	1.3701	2.72444	1.88715	1.16797	2.74876	2.1234	1.83444	1.66607
1.48003	1.07255	2.46515	1.80058	1.39963	2.70303	1.83517	1.1762	2.72077	2.23003	1.81493	1.6648
1.48969	1.07246	2.47148	1.78948	1.43438	2.68928	1.78596	1.1828	2.71164	2.36659	1.76908	1.65948
1.49177	1.06813	2.47115	1.77893	1.47392	2.69024	1.73993	1.18726	2.74657	2.52901	1.71895	1.64927
1.49367	1.05971	2.46442	1.76824	1.51644	2.7122	1.69798	1.19048	2.83704	2.70384	1.69879	1.63202
1.50063	1.04863	2.4514	1.75465	1.55852	2.7556	1.66536	1.19215	2.96349	2.87359	1.72764	1.60145
1.5141	1.03656	2.43594	1.73814	1.59621	2.81462	1.65231	1.19115	3.08637	3.02499	1.79188	1.55102
1.53207	1.02495	2.42467	1.72337	1.62762	2.88217	1.67112	1.18771	3.17084	3.1475	1.85972	1.48436
1.5467	1.01519	2.42103	1.71559	1.65326	2.95336	1.73114	1.18555	3.20243	3.23027	1.90816	1.41717
1.54823	1.00859	2.42115	1.71947	1.67345	3.0242	1.83381	1.19445	3.19195	3.26561	1.93383	1.36366
1.53252	1.00567	2.41787	1.74144	1.68749	3.08968	1.97196	1.22997	3.16874	3.25768	1.94654	1.32539
1.50216	1.00585	2.40831	1.78986	1.69422	3.1442	2.13258	1.30622	3.16058	3.22376	1.95898	1.29777
1.46473	1.00746	2.3951	1.87509	1.69089	3.18108	2.29915	1.42599	3.17429	3.17879	1.98632	1.27726
1.43368	1.00818	2.38324	2.00825	1.6719	3.19265	2.45569	1.57689	3.19767	3.11896	2.04692	1.26113
1.42479	1.00649	2.37634	2.18996	1.63137	3.17608	2.59037	1.73805	3.21878	3.01983	2.15004	1.25019
1.44275	1.00296	2.37464	2.39962	1.5696	3.1412	2.69713	1.89066	3.23477	2.8535	2.27998	1.24628
1.47342	0.999305	2.37679	2.60074	1.49672	3.10599	2.77356	2.02242	3.23974	2.61911	2.40189	1.252
1.49811	0.996405	2.38125	2.7634	1.4283	3.08326	2.81677	2.12657	3.21427	2.37212	2.48845	1.2679
1.51122	0.993541	2.38568	2.87722	1.37613	3.07276	2.82012	2.20309	3.13644	2.2179	2.53869	1.29059
1.52072	0.989312	2.38649	2.94801	1.34307	3.06229	2.77615	2.25747	3.00086	2.22552	2.57135	1.31919
1.53566	0.983342	2.38165	2.98858	1.327	3.03792	2.68465	2.29546	2.82816	2.34379	2.61267	1.35215
1.55734	0.976973	2.37394	3.01078	1.32717	2.99252	2.55758	2.32048	2.65704	2.46159	2.68584	1.38458
1.5799	0.970827	2.36959	3.02168	1.34195	2.92905	2.41543	2.33575	2.52477	2.50588	2.79627	1.41317
1.59629	0.962649	2.37307	3.02303	1.36396	2.85945	2.27839	2.347	2.44624	2.46333	2.91949	1.43481
1.60418	0.948589	2.38162	3.01458	1.38267	2.79409	2.15869	2.35935	2.40866	2.35807	3.01074	1.44316
1.60817	0.926428	2.38655	2.99656	1.39027	2.73317	2.05934	2.37279	2.38971	2.22626	3.0331	1.43462
1.61565	0.898139	2.38082	2.96839	1.38419	2.67423	1.98024	2.38528	2.38269	2.10164	2.98126	1.41079
1.63004	0.869376	2.36392	2.92877	1.36716	2.62146	1.92537	2.39608	2.39452	2.01176	2.87792	1.38251
1.64952	0.845498	2.3394	2.87972	1.34516	2.58236	1.90396	2.40276	2.4217	1.97072	2.75502	1.37093
1.66966	0.828462	2.30992	2.82738	1.32486	2.55748	1.92459	2.39931	2.43898	1.97281	2.63574	1.38927
1.685	0.817885	2.27661	2.77658	1.31235	2.54153	1.98873	2.38355	2.42188	1.99857	2.52564	1.4252
1.69095	0.813509	2.24279	2.72611	1.3123	2.53201	2.08819	2.36234	2.3718	2.02433	2.425	1.45445
1.6873	0.816207	2.21626	2.67168	1.32623	2.5317	2.20879	2.34458	2.31443	2.03192	2.34177	1.47476
1.67757	0.827235	2.20605	2.61006	1.35013	2.54201	2.33763	2.32845	2.28257	2.01928	2.28952	1.51395
1.6659	0.846442	2.21692	2.54141	1.37426	2.55591	2.46878	2.29757	2.29954	2.00164	2.2772	1.5922
1.65526	0.870267	2.24666	2.4696	1.38797	2.56301	2.60413	2.23691	2.36849	1.99939	2.29755	1.69538
1.64591	0.891412	2.28857	2.39798	1.3859	2.56575	2.74966	2.15269	2.4736	2.02323	2.31839	1.80316
1.63712	0.90197	2.33674	2.32804	1.3697	2.5789	2.9106	2.06743	2.59448	2.06459	2.29949	1.91348
1.62967	0.898769	2.38649	2.26403	1.34467	2.6054	3.08772	1.99282	2.72207	2.10015	2.22969	2.02349
1.62561	0.88616	2.43148	2.21364	1.31589	2.62767	3.27445	1.91419	2.8593	2.10966	2.1422	2.1148
1.62618	0.873849	2.46502	2.18121	1.28703	2.63141	3.45643	1.80914	3.01028	2.08804	2.08346	2.17085
1.62898	0.871338	2.48461	2.1601	1.26196	2.62747	3.61373	1.67318	3.16926	2.046	2.06917	2.1912
1.63192	0.881716	2.49405	2.13705	1.2452	2.64211	3.72514	1.52268	3.31782	1.99973	2.0789	2.18994
1.63664	0.900406	2.50021	2.10381	1.2413	2.68859	3.77272	1.37955	3.43027	1.95683	2.09171	2.18964
1.64599	0.920547	2.50946	2.06294	1.25461	2.7552	3.74214	1.25759	3.48193	1.91207	2.11208	2.20689
1.66104	0.938296	2.52546	2.02363	1.28703	2.82017	3.62086	1.16024	3.45879	1.85726	2.15833	2.23849
1.67983	0.953117	2.54692	1.99361	1.33507	2.87137	3.40008	1.08681	3.35986	1.79242	2.2307	2.27117
1.69992	0.965112	2.56771	1.97714	1.39053	2.91162	3.07901	1.03814	3.20296	1.72534	2.30266	2.29773
1.72035	0.973593	2.58052	1.97645	1.44521	2.94797	2.66977	1.0155	3.0333	1.66755	2.35082	2.32095
1.73829	0.977439	2.58193	1.98944	1.49399	2.97717	2.20363	1.01456	2.90271	1.62872	2.37545	2.3488
1.74496	0.975876	2.57448	2.0053	1.53451	2.98713	1.74203	1.02158	2.83655	1.61029	2.39715	2.38628
1.73089	0.969726	2.56411	2.00864	1.56693	2.97213	1.38953	1.02038	2.83526	1.60469	2.43803	2.42772
1.69789	0.961692	2.55546	1.9944	1.59405	2.94028	1.26103	1.00389	2.89591	1.60672	2.49757	2.45849
