# Supplementary material for: The inter-trial and inter-session reliability of Theia3D-derived markerless gait analysis in tight versus loose clothing
Source: PeerJ. 2025 Jan 2;13:e18613. doi: 10.7717/peerj.18613 (PMC11700486; doi:10.7717/peerj.18613)
Supplement: Supplemental Information 2 [file peerj-13-18613-s002.xlsx]

## Sheet: tight means
Pelvic Tilt	Pelvic Ob.	Pelvic Rot.	Hip Sagittal	Hip Frontal	Hip Trans.	Knee Sagittal	Knee Frontal	Knee Trans.	Ankle Sagittal	Ankle Frontal	Ankle Trans.
-2.68198	-1.5321	6.16197	30.4264	-1.95332	-3.42562	0.370404	-2.12321	-19.7912	5.38075	-7.86812	-11.184
-2.66827	-1.50256	6.39056	30.5796	-1.89607	-3.40746	1.16134	-2.09431	-19.6288	5.65832	-7.62691	-11.2441
-2.63646	-1.38839	6.63284	30.7093	-1.70045	-3.40725	2.47851	-2.14526	-19.4159	5.74236	-7.32555	-11.118
-2.61349	-1.17688	6.87198	30.7981	-1.35243	-3.40295	4.09277	-2.26682	-19.2062	5.5215	-7.00822	-10.8128
-2.62237	-0.862714	7.08814	30.8445	-0.854583	-3.37304	5.80458	-2.42943	-19.0244	4.92185	-6.68906	-10.3473
-2.67443	-0.451777	7.26279	30.8639	-0.228809	-3.30075	7.49695	-2.59146	-18.8508	3.94307	-6.34413	-9.75115
-2.76291	0.0371989	7.38151	30.8807	0.486219	-3.18025	9.15436	-2.70957	-18.6349	2.68631	-5.92755	-9.06908
-2.86284	0.574731	7.43511	30.9125	1.24316	-3.02061	10.8361	-2.74813	-18.3319	1.3482	-5.40695	-8.35917
-2.93874	1.12547	7.41974	30.9551	1.99687	-2.84494	12.6168	-2.68742	-17.9331	0.169679	-4.7954	-7.679
-2.95446	1.65381	7.33941	30.973	2.71235	-2.68192	14.5259	-2.52774	-17.4705	-0.638763	-4.15152	-7.06804
-2.88477	2.13045	7.20812	30.9049	3.3691	-2.55443	16.5186	-2.2886	-16.9973	-0.955391	-3.55048	-6.5386
-2.72481	2.53654	7.04678	30.6844	3.9613	-2.47211	18.486	-2.00332	-16.5672	-0.764913	-3.05377	-6.08353
-2.49311	2.864	6.87503	30.2629	4.49462	-2.42872	20.2937	-1.71143	-16.2224	-0.139178	-2.69527	-5.69451
-2.22447	3.11263	6.70273	29.6212	4.98082	-2.39993	21.822	-1.44823	-15.9926	0.802009	-2.48241	-5.3691
-1.95684	3.28504	6.52732	28.766	5.43014	-2.34689	22.9906	-1.23541	-15.8936	1.9286	-2.40501	-5.10369
-1.71936	3.38254	6.33721	27.7178	5.84496	-2.23207	23.7641	-1.08022	-15.9221	3.12527	-2.44597	-4.88875
-1.52732	3.40479	6.11773	26.5027	6.21874	-2.03781	24.1475	-0.983583	-16.0548	4.30259	-2.58911	-4.71858
-1.38423	3.35263	5.8548	25.1498	6.54042	-1.77906	24.1772	-0.949068	-16.2522	5.40108	-2.82345	-4.60398
-1.28809	3.23156	5.53723	23.692	6.80048	-1.49917	23.9102	-0.983117	-16.4666	6.38923	-3.13923	-4.57326
-1.23427	3.05281	5.15828	22.1628	6.99452	-1.25387	23.4096	-1.08938	-16.6457	7.25419	-3.5202	-4.65719
-1.21486	2.8324	4.71509	20.5895	7.12437	-1.09572	22.7324	-1.26534	-16.7331	7.99059	-3.94158	-4.86825
-1.21876	2.58911	4.20713	18.9894	7.19738	-1.06236	21.9212	-1.50151	-16.6704	8.59095	-4.37058	-5.18899
-1.23319	2.34231	3.63611	17.3697	7.22499	-1.16943	21.0025	-1.78193	-16.4072	9.04355	-4.77165	-5.57468
-1.24546	2.10996	3.00803	15.7296	7.22147	-1.40463	19.9912	-2.08455	-15.923	9.34106	-5.115	-5.96715
-1.24391	1.90637	2.33641	14.0633	7.20207	-1.72846	18.8978	-2.38535	-15.2437	9.48752	-5.38634	-6.31367
-1.21803	1.73949	1.64303	12.3609	7.17989	-2.08325	17.7323	-2.6641	-14.4488	9.49875	-5.59956	-6.58302
-1.15927	1.60899	0.954574	10.6115	7.16192	-2.40849	16.506	-2.90714	-13.6646	9.39868	-5.80948	-6.76614
-1.06279	1.50638	0.297274	8.80897	7.1456	-2.65473	15.2341	-3.10444	-13.0383	9.21354	-6.10596	-6.86575
-0.930046	1.41759	-0.308698	6.9578	7.11794	-2.79135	13.9365	-3.24557	-12.6988	8.97019	-6.58161	-6.89402
-0.769763	1.32715	-0.854999	5.07465	7.05817	-2.80837	12.6375	-3.31813	-12.7167	8.70231	-7.28939	-6.87593
-0.596198	1.22178	-1.34596	3.1849	6.94268	-2.71339	11.3632	-3.30925	-13.0792	8.45717	-8.21285	-6.84945
-0.426708	1.09355	-1.79251	1.3182	6.75286	-2.52476	10.1362	-3.21005	-13.7013	8.28851	-9.26752	-6.8545
-0.283411	0.941966	-2.20422	-0.491071	6.48381	-2.26262	8.97362	-3.02298	-14.4617	8.23662	-10.3272	-6.92164
-0.189615	0.774417	-2.58457	-2.20957	6.14927	-1.94337	7.8849	-2.76804	-15.2403	8.31284	-11.2589	-7.07128
-0.160129	0.605951	-2.93148	-3.81724	5.78128	-1.58395	6.87282	-2.48208	-15.9385	8.50378	-11.9587	-7.31015
-0.192854	0.457889	-3.24087	-5.31626	5.42372	-1.20954	5.93688	-2.2084	-16.4861	8.79026	-12.3775	-7.62187
-0.271958	0.353526	-3.51249	-6.72518	5.12062	-0.85209	5.0787	-1.98165	-16.845	9.16269	-12.5286	-7.96009
-0.378144	0.311997	-3.75293	-8.06564	4.90432	-0.54309	4.30491	-1.81819	-17.0127	9.62149	-12.4769	-8.26035
-0.499366	0.343433	-3.97365	-9.34978	4.78888	-0.302608	3.62618	-1.71605	-17.0183	10.1637	-12.3092	-8.46742
-0.631835	0.447692	-4.18621	-10.5794	4.77045	-0.130927	3.05392	-1.66194	-16.9112	10.7696	-12.103	-8.55995
-0.773181	0.616911	-4.39821	-11.7541	4.83248	-0.0100551	2.59775	-1.63957	-16.7476	11.4038	-11.9092	-8.56
-0.920175	0.839531	-4.61123	-12.8741	4.95293	0.0872862	2.26569	-1.6351	-16.5756	12.0263	-11.7479	-8.51994
-1.0703	1.10299	-4.8212	-13.9393	5.11015	0.18769	2.06493	-1.63916	-16.4239	12.604	-11.6132	-8.49659
-1.22094	1.39403	-5.02068	-14.9494	5.28508	0.30906	2.0007	-1.64729	-16.3009	13.1127	-11.4879	-8.53198
-1.3709	1.69786	-5.20309	-15.9018	5.46105	0.454944	2.07658	-1.65933	-16.203	13.5342	-11.3632	-8.64339
-1.5203	1.9981	-5.36535	-16.7901	5.62267	0.613769	2.29691	-1.67832	-16.1244	13.8526	-11.248	-8.8252
-1.66718	2.2778	-5.50846	-17.607	5.75394	0.764206	2.66966	-1.70875	-16.0594	14.0526	-11.16	-9.06255
-1.80098	2.52057	-5.63729	-18.3523	5.83591	0.884029	3.20597	-1.75435	-15.9989	14.1152	-11.111	-9.3449
-1.90575	2.71109	-5.76187	-19.0305	5.84611	0.958933	3.9188	-1.81624	-15.9263	14.0153	-11.0998	-9.66443
-1.96779	2.83512	-5.89725	-19.6431	5.76114	0.986415	4.82054	-1.89275	-15.8164	13.7197	-11.1142	-10.0035
-1.98375	2.8789	-6.05948	-20.1807	5.56094	0.971462	5.92083	-1.98123	-15.6422	13.1884	-11.1388	-10.3291
-1.9638	2.82873	-6.25891	-20.6193	5.23201	0.920309	7.22553	-2.07911	-15.3875	12.3786	-11.1621	-10.6001
-1.9266	2.67203	-6.49457	-20.9261	4.76904	0.836099	8.73819	-2.18337	-15.0562	11.2488	-11.1788	-10.78
-1.89313	2.40146	-6.75285	-21.0642	4.17679	0.715517	10.4633	-2.28929	-14.6685	9.75968	-11.1875	-10.8391
-1.88102	2.0191	-7.00951	-20.9968	3.47124	0.546423	12.41	-2.39065	-14.2481	7.88105	-11.1872	-10.7561
-1.90097	1.53935	-7.23399	-20.691	2.67939	0.309525	14.5948	-2.48225	-13.8108	5.6062	-11.1742	-10.5273
-1.95196	0.990008	-7.39722	-20.1254	1.83663	-0.0127246	17.0366	-2.56283	-13.3629	2.95675	-11.1413	-10.168
-2.01773	0.409508	-7.48093	-19.2988	0.981141	-0.422137	19.7492	-2.63604	-12.9047	-0.0180745	-11.0743	-9.71091
-2.06818	-0.158643	-7.48358	-18.2328	0.149365	-0.896532	22.732	-2.70952	-12.4415	-3.24569	-10.9499	-9.1983
-2.06871	-0.674851	-7.41921	-16.9646	-0.628097	-1.39256	25.9628	-2.79067	-11.9936	-6.63906	-10.7376	-8.67168
-1.99596	-1.11265	-7.31056	-15.5321	-1.32894	-1.85731	29.3954	-2.88086	-11.5966	-10.0975	-10.4006	-8.1701
-1.84832	-1.46224	-7.17929	-13.9613	-1.93797	-2.24336	32.9641	-2.97299	-11.2841	-13.4983	-9.89497	-7.73389
-1.64547	-1.72708	-7.03794	-12.2642	-2.44359	-2.52124	36.5956	-3.05458	-11.0635	-16.6788	-9.1769	-7.40666
-1.41848	-1.91641	-6.88834	-10.4444	-2.83452	-2.68565	40.2235	-3.11559	-10.9103	-19.4246	-8.22646	-7.22642
-1.19882	-2.0388	-6.72471	-8.50282	-3.09947	-2.75329	43.7983	-3.15499	-10.7841	-21.4923	-7.07228	-7.20513
-1.01464	-2.10026	-6.53799	-6.43924	-3.22999	-2.75524	47.2819	-3.18004	-10.6521	-22.6712	-5.79115	-7.31419
-0.888916	-2.10562	-6.31916	-4.25575	-3.22451	-2.72701	50.6305	-3.19938	-10.495	-22.8643	-4.47604	-7.48969
-0.831776	-2.0605	-6.06135	-1.96887	-3.09169	-2.70129	53.7809	-3.21779	-10.3019	-22.1361	-3.20087	-7.65837
-0.836256	-1.97163	-5.76104	0.384651	-2.85019	-2.69865	56.6526	-3.23213	-10.0704	-20.6955	-2.00604	-7.77236
-0.883461	-1.84559	-5.41537	2.75439	-2.52528	-2.72309	59.165	-3.22684	-9.81553	-18.8253	-0.907692	-7.82513
-0.949445	-1.68857	-5.01771	5.08557	-2.14698	-2.76619	61.2542	-3.17171	-9.57321	-16.7965	0.0841902	-7.8399
-1.01437	-1.50744	-4.55523	7.33187	-1.74908	-2.81466	62.8849	-3.02611	-9.38697	-14.8056	0.959518	-7.84603
-1.06699	-1.31043	-4.01121	9.46343	-1.3661	-2.85818	64.0527	-2.75272	-9.28981	-12.9536	1.71133	-7.85964
-1.10385	-1.10661	-3.37396	11.4689	-1.02808	-2.89411	64.7783	-2.33619	-9.29693	-11.2619	2.33404	-7.87272
-1.12572	-0.904433	-2.64837	13.3515	-0.7545	-2.93105	65.0961	-1.80069	-9.4054	-9.711	2.81686	-7.85409
-1.13084	-0.710748	-1.86296	15.1196	-0.550235	-2.98773	65.0409	-1.21404	-9.60112	-8.27332	3.13792	-7.76414
-1.11329	-0.531071	-1.06844	16.7789	-0.405442	-3.08576	64.6376	-0.671824	-9.86268	-6.93009	3.27274	-7.57274
-1.06726	-0.369934	-0.327648	18.3324	-0.299632	-3.24065	63.8978	-0.267456	-10.1582	-5.67252	3.21808	-7.27397
-0.992848	-0.229874	0.303631	19.7818	-0.209106	-3.45727	62.8231	-0.0596805	-10.4507	-4.48872	3.00593	-6.88938
-0.897963	-0.109176	0.799164	21.1278	-0.115999	-3.7347	61.4128	-0.0547464	-10.7117	-3.35937	2.69779	-6.46809
-0.796822	-0.00099525	1.17449	22.3705	-0.0150706	-4.07112	59.6744	-0.210538	-10.9304	-2.26822	2.36987	-6.08998
-0.70535	0.104104	1.47859	23.51	0.0858758	-4.46056	57.6275	-0.457397	-11.1089	-1.21947	2.10063	-5.84639
-0.635216	0.2127	1.7688	24.5453	0.172321	-4.88775	55.2995	-0.727378	-11.261	-0.241695	1.94666	-5.79617
-0.590317	0.322849	2.08392	25.4733	0.231054	-5.32909	52.7129	-0.97905	-11.4175	0.626092	1.90767	-5.92245
-0.569441	0.421811	2.43044	26.2897	0.25435	-5.75276	49.8762	-1.20003	-11.6248	1.35188	1.91285	-6.1348
-0.571156	0.490066	2.78869	26.9911	0.239401	-6.12233	46.7842	-1.39254	-11.9384	1.92772	1.83842	-6.3214
-0.596398	0.510295	3.1302	27.5755	0.186577	-6.40373	43.4277	-1.56017	-12.4076	2.37456	1.55511	-6.40913
-0.648899	0.47492	3.43327	28.0441	0.0980626	-6.57025	39.8061	-1.70264	-13.0482	2.72838	0.989339	-6.38937
-0.733301	0.386653	3.6903	28.4023	-0.0230729	-6.60662	35.9351	-1.81893	-13.8353	3.02197	0.148157	-6.30748
-0.851534	0.253266	3.90713	28.6574	-0.174554	-6.51422	31.8486	-1.91352	-14.7206	3.27736	-0.903042	-6.2351
-0.997322	0.0816529	4.09768	28.8132	-0.356276	-6.31423	27.5971	-1.99842	-15.6485	3.50664	-2.07428	-6.24643
-1.1596	-0.124343	4.27686	28.8739	-0.570212	-6.04195	23.2488	-2.08568	-16.5602	3.71543	-3.2687	-6.39777
-1.33077	-0.361701	4.45387	28.8536	-0.817345	-5.73158	18.8929	-2.17656	-17.4013	3.9057	-4.39353	-6.71604
-1.50652	-0.624458	4.62795	28.7763	-1.09275	-5.4049	14.642	-2.25869	-18.133	4.0772	-5.37325	-7.19425
-1.68446	-0.90216	4.78927	28.6749	-1.38314	-5.07113	10.6323	-2.31355	-18.739	4.23026	-6.16373	-7.79772
-1.86245	-1.18194	4.92669	28.5866	-1.67039	-4.73579	7.01977	-2.32718	-19.2215	4.37405	-6.7542	-8.47925
-2.03544	-1.45072	5.03737	28.5442	-1.93663	-4.41007	3.96979	-2.29674	-19.5884	4.53411	-7.15675	-9.19267
-2.19287	-1.69535	5.13057	28.5674	-2.1657	-4.11071	1.63698	-2.23091	-19.8461	4.74407	-7.394	-9.89262
-2.32252	-1.90132	5.22448	28.6609	-2.3408	-3.85526	0.136514	-2.14727	-19.9958	5.02372	-7.48963	-10.5223
-2.41529	-2.05161	5.33977	28.8134	-2.44109	-3.66183	-0.488398	-2.06964	-20.0325	5.35617	-7.46675	-11.0076
-2.46544	-2.12748	5.49151	28.995	-2.4416	-3.54775	-0.290801	-2.02325	-19.9533	5.67449	-7.35432	-11.2651

## Sheet: tight sd
Pelvic Tilt	Pelvic Ob.	Pelvic Rot.	Hip Sagittal	Hip Frontal	Hip Trans.	Knee Sagittal	Knee Frontal	Knee Trans.	Ankle Sagittal	Ankle Frontal	Ankle Trans.
2.07856	1.3041	2.76982	3.12078	2.58157	2.91805	3.05933	2.28086	4.92289	2.13393	2.21433	3.05857
2.07742	1.35058	2.83125	3.22037	2.72395	3.02078	3.23607	2.28297	4.87423	2.10847	2.31817	3.15838
2.08599	1.41112	2.8994	3.30951	2.8577	3.12621	3.40349	2.28537	4.80473	2.12241	2.39613	3.2796
2.10447	1.47709	2.96493	3.39264	2.9601	3.21738	3.55748	2.29146	4.72526	2.19669	2.44099	3.40546
2.12925	1.53857	3.01404	3.47506	3.01796	3.27769	3.71094	2.30496	4.64502	2.33085	2.45439	3.52825
2.15149	1.58703	3.0339	3.55944	3.02904	3.29273	3.88457	2.32766	4.57152	2.48032	2.44814	3.64903
2.16185	1.6166	3.01919	3.64714	2.99802	3.25567	4.10248	2.35718	4.51227	2.57447	2.43967	3.77088
2.15825	1.62587	2.97596	3.73874	2.93282	3.1728	4.38304	2.38697	4.47663	2.56058	2.4492	3.88757
2.14775	1.6199	2.91868	3.8329	2.84518	3.0678	4.72451	2.40795	4.47326	2.43082	2.49607	3.97651
2.14592	1.60895	2.86307	3.92475	2.75341	2.97829	5.10152	2.41051	4.50204	2.224	2.58637	4.00957
2.16998	1.60358	2.8204	4.00594	2.67853	2.93756	5.47851	2.38956	4.5498	2.01105	2.70591	3.97057
2.22636	1.6099	2.79522	4.06931	2.63467	2.95251	5.82544	2.35048	4.5966	1.86802	2.83404	3.86838
2.305	1.62739	2.78757	4.11302	2.62182	2.99818	6.12358	2.30902	4.62255	1.83835	2.96295	3.73252
2.38628	1.65014	2.79618	4.14029	2.6272	3.03616	6.3639	2.28172	4.61177	1.91252	3.09426	3.59007
2.4521	1.6704	2.8197	4.15764	2.63414	3.0419	6.54398	2.27783	4.55965	2.04642	3.22283	3.45424
2.49304	1.68315	2.85676	4.17221	2.63104	3.01577	6.66715	2.29721	4.47887	2.19357	3.32977	3.32709
2.50984	1.68811	2.90513	4.1908	2.61324	2.97848	6.74074	2.33022	4.39642	2.32256	3.39056	3.20797
2.50942	1.68774	2.95996	4.21563	2.57918	2.95768	6.77062	2.36018	4.3404	2.41685	3.3906	3.10075
2.49901	1.68285	3.0132	4.24	2.52722	2.96923	6.75681	2.37308	4.32979	2.47282	3.33528	3.01462
2.48494	1.6708	3.0557	4.25067	2.45798	3.00898	6.69434	2.36782	4.37475	2.49594	3.24668	2.96004
2.47179	1.6484	3.08088	4.23688	2.37982	3.06002	6.57705	2.35776	4.47329	2.49685	3.14904	2.94589
2.46142	1.61614	3.08715	4.19722	2.30924	3.10285	6.40214	2.35954	4.60434	2.48863	3.05551	2.97508
2.4551	1.5792	3.08009	4.1366	2.2632	3.12131	6.17105	2.38183	4.73039	2.48181	2.96866	3.03865
2.45475	1.54432	3.07325	4.06226	2.24896	3.10987	5.88811	2.42265	4.81636	2.48106	2.89171	3.11163
2.459	1.51571	3.08341	3.97765	2.26015	3.07794	5.56077	2.47015	4.84505	2.48502	2.83171	3.16182
2.46109	1.49369	3.11985	3.88245	2.28141	3.04718	5.20148	2.50612	4.81757	2.48754	2.79662	3.16804
2.45382	1.47564	3.17756	3.77904	2.29526	3.04109	4.82819	2.51383	4.74501	2.48167	2.79114	3.12513
2.43362	1.45799	3.24129	3.67467	2.28843	3.06997	4.46164	2.48721	4.64225	2.46495	2.81571	3.03873
2.40143	1.43832	3.29432	3.57913	2.25696	3.12317	4.11944	2.43498	4.53047	2.44232	2.86832	2.92556
2.36174	1.41629	3.32506	3.5016	2.207	3.17618	3.81031	2.3757	4.43641	2.42469	2.94206	2.81086
2.32148	1.39271	3.32987	3.44484	2.1492	3.20737	3.53254	2.32654	4.37837	2.4224	3.0153	2.71337
2.28842	1.36733	3.31194	3.40507	2.09081	3.20973	3.27992	2.2963	4.35449	2.43602	3.05619	2.63781
2.26517	1.33872	3.27736	3.37557	2.03427	3.19311	3.05075	2.28608	4.35675	2.45483	3.04969	2.57937
2.24537	1.30596	3.23322	3.35323	1.98188	3.17519	2.85418	2.29242	4.39237	2.46887	3.01018	2.53115
2.2205	1.27028	3.18962	3.34361	1.93939	3.17337	2.7076	2.31048	4.47779	2.47895	2.95809	2.48688
2.18632	1.23569	3.15975	3.35447	1.91467	3.19852	2.62507	2.33611	4.61348	2.49425	2.89098	2.44252
2.14473	1.20774	3.15519	3.38932	1.91428	3.24893	2.60699	2.36612	4.77901	2.52697	2.79331	2.40447
2.10237	1.1912	3.17967	3.44508	1.94101	3.31281	2.63886	2.3967	4.94908	2.58987	2.66679	2.38992
2.06362	1.1884	3.22705	3.51389	1.99332	3.37562	2.6988	2.42385	5.09915	2.69081	2.5394	2.40787
2.02791	1.1998	3.28439	3.58384	2.06663	3.42335	2.76521	2.44644	5.20228	2.82823	2.44287	2.43658
1.9939	1.22533	3.33757	3.64233	2.15424	3.44626	2.82202	2.46777	5.23809	2.99369	2.39051	2.43512
1.96321	1.26475	3.37751	3.68297	2.24786	3.44146	2.86144	2.49154	5.20692	3.17559	2.37599	2.38396
1.94112	1.31697	3.40301	3.70896	2.33866	3.41231	2.88466	2.5165	5.13108	3.36454	2.38578	2.30295
1.93032	1.37965	3.41956	3.7278	2.41972	3.36612	2.89925	2.53634	5.04242	3.55492	2.40846	2.23092
1.93047	1.44897	3.4356	3.74567	2.48824	3.31227	2.91344	2.54397	4.96828	3.74617	2.43676	2.19635
1.94427	1.51931	3.45803	3.76671	2.54517	3.26122	2.93068	2.53629	4.92211	3.94262	2.46545	2.20649
1.97796	1.58458	3.48941	3.7948	2.59312	3.2243	2.94818	2.51574	4.90407	4.14761	2.48821	2.25495
2.03204	1.64118	3.52794	3.83068	2.6352	3.2114	2.96011	2.48862	4.91102	4.35972	2.49766	2.33317
2.09393	1.68989	3.56964	3.86796	2.67539	3.22957	2.96227	2.46173	4.94512	4.575	2.49075	2.43531
2.14679	1.73491	3.61096	3.89913	2.71856	3.28073	2.95617	2.43894	5.01269	4.79294	2.47241	2.55459
2.18036	1.78045	3.65002	3.9209	2.76936	3.35896	2.95008	2.42016	5.11551	5.01499	2.45404	2.68052
2.19563	1.82743	3.68506	3.93764	2.82877	3.4521	2.95611	2.40212	5.24566	5.24085	2.44847	2.79678
2.19917	1.8724	3.71216	3.95477	2.89031	3.54955	2.98472	2.38075	5.38804	5.46648	2.46669	2.88312
2.19466	1.90931	3.72369	3.97406	2.93979	3.64919	3.04198	2.3545	5.52735	5.68374	2.516	2.92362
2.18047	1.93167	3.70975	3.99419	2.96038	3.75683	3.13031	2.32822	5.65506	5.88186	2.60187	2.91286
2.15275	1.93447	3.66271	4.01477	2.94188	3.8798	3.25127	2.31495	5.77084	6.04746	2.72775	2.85771
2.11321	1.91575	3.5827	4.04079	2.88782	4.02033	3.40763	2.33068	5.87866	6.16816	2.89435	2.7784
2.07124	1.87771	3.48021	4.07904	2.81443	4.17291	3.60131	2.38671	5.97969	6.23677	3.09629	2.69885
2.04307	1.82765	3.37198	4.13418	2.74259	4.32525	3.82761	2.48426	6.06817	6.25072	3.32119	2.62952
2.04532	1.77627	3.27432	4.20761	2.68753	4.46025	4.07196	2.61437	6.1328	6.21359	3.55316	2.56921
2.08516	1.73264	3.19851	4.29654	2.6526	4.55878	4.3124	2.76226	6.1614	6.13307	3.77784	2.51803
2.15722	1.7005	3.14916	4.39414	2.63212	4.60475	4.52699	2.91238	6.14834	6.01324	3.98702	2.47745
2.24938	1.67833	3.12464	4.49326	2.61873	4.59046	4.70073	3.0529	6.09948	5.85651	4.17597	2.4457
2.34962	1.66301	3.11961	4.59133	2.60722	4.52137	4.82696	3.17941	6.0304	5.68201	4.34219	2.41681
2.44876	1.65272	3.12858	4.69146	2.59399	4.41605	4.90503	3.29278	5.95762	5.55109	4.49475	2.39429
2.53636	1.64702	3.14695	4.79179	2.57603	4.29661	4.93691	3.39246	5.88573	5.54851	4.65494	2.39241
2.59889	1.6447	3.17068	4.87386	2.55234	4.17641	4.92431	3.47179	5.79797	5.69403	4.84364	2.41863
2.62623	1.64163	3.19677	4.91093	2.52416	4.05695	4.86774	3.51942	5.66526	5.89342	5.07202	2.46493
2.61565	1.63213	3.22348	4.8821	2.49262	3.93443	4.76868	3.52649	5.46891	6.01529	5.33292	2.51302
2.57255	1.6121	3.24732	4.7827	2.45626	3.80666	4.63349	3.49487	5.21764	5.99243	5.60127	2.54987
2.51208	1.57974	3.25973	4.63477	2.41027	3.67451	4.47706	3.44027	4.94647	5.84492	5.84851	2.57814
2.45433	1.53438	3.24891	4.47882	2.34921	3.54263	4.32156	3.38804	4.70427	5.63559	6.05169	2.61006
2.41771	1.47613	3.20583	4.35502	2.27158	3.42029	4.19104	3.36195	4.53332	5.42049	6.18836	2.65509
2.41248	1.40748	3.12833	4.28444	2.18279	3.3209	4.10559	3.37203	4.45301	5.22975	6.23231	2.7115
2.43638	1.33481	3.02118	4.26405	2.09383	3.2554	4.07678	3.40912	4.45586	5.07295	6.16403	2.77024
2.4779	1.26785	2.89365	4.27684	2.01795	3.22362	4.10427	3.45157	4.51504	4.94892	5.99052	2.82743
2.5244	1.21689	2.75507	4.30399	1.96704	3.21135	4.17764	3.47808	4.59696	4.8518	5.75278	2.88775
2.5666	1.18769	2.61352	4.32973	1.94721	3.19695	4.28274	3.47764	4.66848	4.77813	5.50794	2.9432
2.59912	1.1779	2.47965	4.34315	1.95508	3.16491	4.40706	3.45448	4.69843	4.72634	5.30806	2.96078
2.62128	1.17942	2.36747	4.34224	1.97838	3.11383	4.54175	3.42029	4.66518	4.68693	5.18341	2.9187
2.63635	1.18516	2.28697	4.33209	2.00158	3.05095	4.67942	3.37837	4.57729	4.63588	5.13138	2.85691
2.64729	1.19389	2.23705	4.318	2.01303	2.98418	4.81226	3.31958	4.48462	4.54041	5.1183	2.86716
2.65193	1.20934	2.20715	4.30111	2.00891	2.92016	4.93482	3.23419	4.44735	4.37282	5.08765	3.00667
2.64575	1.23442	2.18385	4.28089	1.99125	2.86644	5.04752	3.12057	4.49331	4.12846	4.98415	3.24093
2.62314	1.26727	2.15777	4.25403	1.96401	2.8346	5.15499	2.98105	4.60722	3.8298	4.785	3.47628
2.583	1.30302	2.12848	4.21807	1.93228	2.84228	5.25983	2.81991	4.75023	3.51466	4.50926	3.6276
2.53306	1.33726	2.10508	4.17553	1.90312	2.91072	5.35665	2.64882	4.88543	3.22033	4.20957	3.657
2.48358	1.36645	2.10024	4.1262	1.88662	3.05516	5.43043	2.48564	4.99248	2.96928	3.94163	3.57647
2.44458	1.3877	2.12026	4.0666	1.89314	3.27093	5.46048	2.34298	5.06127	2.76638	3.72534	3.43047
2.4214	1.40014	2.16029	3.99097	1.92781	3.52787	5.42548	2.22069	5.08623	2.60784	3.53625	3.27277
2.41179	1.40616	2.20765	3.89127	1.98721	3.78277	5.3052	2.11229	5.07183	2.49493	3.33857	3.14342
2.40306	1.41073	2.24806	3.75683	2.06281	3.99703	5.08019	2.01691	5.03669	2.43856	3.12427	3.05925
2.38001	1.41826	2.27188	3.58058	2.14707	4.14651	4.73435	1.94754	5.00696	2.44679	2.91401	3.0211
2.33199	1.42904	2.27829	3.36566	2.23615	4.22423	4.26306	1.92605	5.00201	2.50718	2.73077	3.01804
2.25814	1.43952	2.27452	3.13004	2.32792	4.23674	3.68663	1.96228	5.02315	2.58414	2.58464	3.02732
2.1677	1.44808	2.27016	2.90224	2.42176	4.19304	3.06485	2.03811	5.04917	2.63693	2.47483	3.02178
2.07721	1.45839	2.2713	2.71098	2.51834	4.09554	2.50547	2.1179	5.04408	2.64004	2.39078	2.98859
2.00793	1.47721	2.27914	2.57672	2.61945	3.94905	2.1486	2.17117	4.9757	2.59322	2.31901	2.94023
1.97438	1.5096	2.29376	2.50422	2.72748	3.77511	2.08326	2.18562	4.83792	2.51868	2.26152	2.90685
1.97528	1.55678	2.31726	2.48439	2.84151	3.61187	2.25368	2.16577	4.66239	2.4454	2.24307	2.91427
1.99725	1.61673	2.35317	2.50633	2.95363	3.49918	2.53778	2.1242	4.50892	2.39266	2.29272	2.96081

## Sheet: loose means
Pelvic Tilt	Pelvic Ob.	Pelvic Rot.	Hip Sagittal	Hip Frontal	Hip Trans.	Knee Sagittal	Knee Frontal	Knee Trans.	Ankle Sagittal	Ankle Frontal	Ankle Trans.
-2.5537	-0.568804	6.96422	30.2285	-0.808017	-3.99533	-2.05116	-1.9698	-19.0986	3.46155	-5.75952	-11.0938
-2.47931	-0.565883	7.28775	30.3422	-0.832555	-4.12077	-1.20148	-1.88374	-18.7583	3.66269	-5.37773	-11.0276
-2.3622	-0.503084	7.61569	30.3702	-0.726517	-4.28291	0.119135	-1.87953	-18.3589	3.71331	-4.97415	-10.7839
-2.23299	-0.385009	7.90252	30.3296	-0.479506	-4.44052	1.74084	-1.95184	-17.991	3.5327	-4.64902	-10.3577
-2.10531	-0.223626	8.10892	30.2246	-0.0988727	-4.55146	3.50421	-2.07851	-17.7115	3.07108	-4.45434	-9.74647
-1.97462	-0.0373314	8.21048	30.0503	0.390993	-4.58393	5.29872	-2.22999	-17.5185	2.33997	-4.37483	-8.96096
-1.8272	0.15238	8.20084	29.8038	0.953509	-4.52522	7.08242	-2.37874	-17.3641	1.43274	-4.34341	-8.03803
-1.64719	0.325496	8.08819	29.4876	1.54759	-4.384	8.87133	-2.50256	-17.1866	0.516292	-4.28077	-7.04227
-1.41976	0.466838	7.88988	29.1036	2.13419	-4.18563	10.7048	-2.58317	-16.9424	-0.211025	-4.13432	-6.05385
-1.13823	0.568018	7.62583	28.652	2.68197	-3.96446	12.6075	-2.60715	-16.6214	-0.581239	-3.90088	-5.15095
-0.809683	0.627199	7.31317	28.1334	3.17082	-3.75257	14.567	-2.56873	-16.2459	-0.507469	-3.62193	-4.39206
-0.454981	0.64655	6.96511	27.5495	3.5904	-3.5677	16.5314	-2.46849	-15.86	0.00385741	-3.35632	-3.8015
-0.104455	0.629788	6.59106	26.9034	3.93869	-3.40899	18.4233	-2.31323	-15.5145	0.878745	-3.15628	-3.36902
0.210104	0.58092	6.19741	26.1947	4.22046	-3.26057	20.155	-2.11525	-15.2489	2.01354	-3.05386	-3.05838
0.463488	0.504003	5.78914	25.4152	4.44439	-3.10196	21.641	-1.89039	-15.0778	3.30315	-3.05692	-2.81962
0.63513	0.404336	5.37371	24.5545	4.61926	-2.92894	22.8086	-1.65855	-14.9863	4.65377	-3.15505	-2.60982
0.709668	0.289554	4.96157	23.6076	4.75219	-2.75885	23.6098	-1.44005	-14.9438	5.98631	-3.33232	-2.40641
0.681834	0.169171	4.56037	22.5775	4.84931	-2.61685	24.0326	-1.24961	-14.9249	7.23647	-3.57931	-2.21624
0.560845	0.0514722	4.16825	21.4742	4.91476	-2.52067	24.1041	-1.09198	-14.9142	8.35803	-3.89276	-2.07017
0.368674	-0.0590288	3.77325	20.313	4.94898	-2.48119	23.883	-0.96508	-14.893	9.32407	-4.26574	-2.00726
0.132221	-0.161976	3.36058	19.1132	4.94864	-2.5128	23.4445	-0.866267	-14.8321	10.1237	-4.6817	-2.05928
-0.123781	-0.259551	2.9217	17.894	4.90903	-2.63323	22.8622	-0.792432	-14.6979	10.7555	-5.1148	-2.23324
-0.382261	-0.353315	2.45919	16.6704	4.82741	-2.85196	22.1955	-0.736452	-14.4638	11.2223	-5.53338	-2.50839
-0.63424	-0.441265	1.98534	15.4498	4.70622	-3.16143	21.4815	-0.687039	-14.1153	11.5285	-5.9057	-2.84822
-0.873749	-0.517418	1.51576	14.2262	4.5545	-3.53708	20.7328	-0.631359	-13.6501	11.6768	-6.20779	-3.21355
-1.0932	-0.574157	1.06104	12.9796	4.38672	-3.94055	19.9401	-0.556239	-13.0833	11.6695	-6.43493	-3.5653
-1.28213	-0.606022	0.621203	11.6808	4.21871	-4.32285	19.0807	-0.447994	-12.4636	11.513	-6.61603	-3.86581
-1.42939	-0.613294	0.184565	10.3001	4.06224	-4.63413	18.1291	-0.296137	-11.8817	11.226	-6.82289	-4.08766
-1.52468	-0.602675	-0.269675	8.81259	3.92306	-4.83733	17.0648	-0.102273	-11.4547	10.8441	-7.15604	-4.23107
-1.5571	-0.585897	-0.766529	7.19725	3.80128	-4.9185	15.8747	0.113906	-11.2839	10.4193	-7.70539	-4.33479
-1.51861	-0.578659	-1.3269	5.44522	3.68949	-4.8862	14.5611	0.320792	-11.4144	10.0193	-8.50575	-4.46509
-1.4113	-0.598667	-1.95659	3.57308	3.57052	-4.76075	13.1526	0.48915	-11.8193	9.71803	-9.51193	-4.69122
-1.25204	-0.659919	-2.64017	1.62853	3.42294	-4.56296	11.705	0.603042	-12.411	9.57455	-10.6068	-5.05577
-1.06948	-0.764265	-3.34419	-0.321243	3.23453	-4.31309	10.2871	0.660421	-13.0679	9.61492	-11.6415	-5.55325
-0.892715	-0.895494	-4.02817	-2.214	3.01376	-4.03411	8.96231	0.667999	-13.6686	9.83183	-12.4878	-6.12953
-0.736721	-1.02107	-4.65684	-4.01654	2.7898	-3.74635	7.77425	0.638209	-14.125	10.1988	-13.0721	-6.70178
-0.601619	-1.10138	-5.20832	-5.72764	2.60235	-3.46198	6.74148	0.585288	-14.4009	10.685	-13.3865	-7.18796
-0.483777	-1.10163	-5.67739	-7.36242	2.48816	-3.18513	5.85986	0.520815	-14.5011	11.2611	-13.4725	-7.53054
-0.382386	-1.00151	-6.07463	-8.93735	2.46964	-2.91508	5.11157	0.452221	-14.4502	11.8973	-13.3933	-7.70966
-0.302907	-0.798763	-6.42073	-10.4576	2.55015	-2.64668	4.47853	0.384336	-14.2834	12.5645	-13.2115	-7.74478
-0.255459	-0.506919	-6.73628	-11.9145	2.71578	-2.37234	3.95267	0.319713	-14.0469	13.2379	-12.9787	-7.69021
-0.252023	-0.150357	-7.03284	-13.2897	2.9409	-2.0873	3.53774	0.258126	-13.7926	13.8971	-12.7315	-7.61901
-0.304561	0.241378	-7.31025	-14.561	3.195	-1.79188	3.24384	0.197941	-13.5639	14.5239	-12.4914	-7.59846
-0.418483	0.638782	-7.56083	-15.7134	3.44767	-1.49145	3.07927	0.138131	-13.3858	15.099	-12.267	-7.67004
-0.58862	1.01642	-7.77705	-16.7449	3.6722	-1.19496	3.0479	0.0785951	-13.2631	15.6005	-12.0601	-7.84332
-0.797412	1.35558	-7.95845	-17.6677	3.84687	-0.909874	3.15217	0.0196445	-13.1874	16.0035	-11.8696	-8.10177
-1.01622	1.64503	-8.11411	-18.5058	3.95423	-0.640579	3.39596	-0.0388509	-13.1437	16.2804	-11.6961	-8.41665
-1.21165	1.8795	-8.2611	-19.2876	3.97951	-0.389268	3.78451	-0.098172	-13.1126	16.399	-11.5431	-8.75769
-1.3541	2.0561	-8.41889	-20.0375	3.91033	-0.157144	4.32206	-0.161601	-13.0694	16.3186	-11.4147	-9.09762
-1.42892	2.17065	-8.60295	-20.7641	3.73753	0.0531021	5.01002	-0.234181	-12.9862	15.9903	-11.3137	-9.41031
-1.44161	2.21624	-8.82029	-21.4555	3.45713	0.232246	5.84664	-0.322198	-12.8385	15.3596	-11.2451	-9.66725
-1.41314	2.18699	-9.06754	-22.0834	3.07479	0.364018	6.82765	-0.433257	-12.6134	14.3738	-11.214	-9.84181
-1.36741	2.08325	-9.33139	-22.6152	2.60763	0.432368	7.94942	-0.573768	-12.312	12.988	-11.2166	-9.91537
-1.31776	1.91571	-9.59029	-23.0253	2.0831	0.427116	9.21672	-0.745925	-11.9487	11.1732	-11.2347	-9.87878
-1.26306	1.70518	-9.81756	-23.2948	1.53549	0.342978	10.6504	-0.946805	-11.5498	8.92596	-11.2458	-9.731
-1.19098	1.47648	-9.98637	-23.4064	0.997798	0.177169	12.2907	-1.16942	-11.1502	6.27642	-11.2363	-9.47794
-1.08633	1.25151	-10.0753	-23.337	0.494088	-0.0703695	14.1923	-1.40424	-10.7869	3.28782	-11.2067	-9.13095
-0.940613	1.04475	-10.0727	-23.0542	0.0368569	-0.396609	16.4124	-1.64292	-10.4908	0.0494104	-11.1658	-8.70552
-0.752239	0.863923	-9.97851	-22.5253	-0.369848	-0.790133	18.9916	-1.88091	-10.2837	-3.3387	-11.1161	-8.22001
-0.523212	0.712517	-9.80325	-21.7301	-0.724756	-1.22624	21.9352	-2.11795	-10.1785	-6.78603	-11.0372	-7.69989
-0.261367	0.590948	-9.56372	-20.6638	-1.02458	-1.66749	25.2047	-2.35516	-10.1788	-10.2182	-10.8787	-7.18406
0.0177511	0.497519	-9.27883	-19.3342	-1.26229	-2.07119	28.7256	-2.59124	-10.2747	-13.556	-10.5665	-6.72735
0.293377	0.430108	-8.96562	-17.7584	-1.4283	-2.40608	32.4065	-2.82203	-10.435	-16.6824	-10.0295	-6.3885
0.545004	0.388465	-8.63609	-15.9609	-1.51277	-2.66533	36.1608	-3.04426	-10.6073	-19.4217	-9.23128	-6.21443
0.756423	0.375286	-8.29597	-13.9689	-1.50717	-2.86412	39.9207	-3.25855	-10.7333	-21.549	-8.19004	-6.22732
0.915701	0.395125	-7.94446	-11.8087	-1.40422	-3.02373	43.6331	-3.46684	-10.7769	-22.8496	-6.97834	-6.41501
1.01224	0.451836	-7.57467	-9.50294	-1.19799	-3.1593	47.242	-3.66628	-10.7428	-23.2038	-5.702	-6.72455
1.0387	0.546365	-7.17631	-7.07697	-0.886863	-3.27716	50.6748	-3.84522	-10.6747	-22.6426	-4.46958	-7.07801
0.995639	0.675071	-6.74134	-4.56454	-0.479428	-3.37358	53.844	-3.9796	-10.6408	-21.3421	-3.36784	-7.40559
0.892362	0.828978	-6.26841	-2.00739	0.00148475	-3.43462	56.6636	-4.03233	-10.7087	-19.5611	-2.44615	-7.67192
0.745355	0.994408	-5.76349	0.549228	0.518592	-3.44481	59.0663	-3.96349	-10.9196	-17.5577	-1.71513	-7.88088
0.572356	1.15546	-5.23695	3.0651	1.02403	-3.40068	61.014	-3.74623	-11.2695	-15.5274	-1.15479	-8.05851
0.38693	1.29811	-4.69849	5.5105	1.4675	-3.31928	62.4957	-3.37856	-11.7074	-13.5841	-0.727461	-8.22861
0.197329	1.4138	-4.15169	7.86549	1.80783	-3.23894	63.5196	-2.88856	-12.1624	-11.7735	-0.39897	-8.39357
0.00757375	1.49998	-3.59242	10.1179	2.02338	-3.20929	64.1032	-2.32957	-12.5831	-10.0977	-0.158246	-8.52423
-0.178319	1.55849	-3.01434	12.2596	2.11623	-3.27236	64.2662	-1.7667	-12.9576	-8.53972	-0.0185913	-8.56697
-0.354558	1.5927	-2.41799	14.2859	2.10832	-3.44675	64.0272	-1.2624	-13.3051	-7.0782	-0.00303632	-8.46503
-0.516052	1.60497	-1.8168	16.1962	2.03299	-3.7242	63.4036	-0.86799	-13.6569	-5.6959	-0.13148	-8.18889
-0.658314	1.59668	-1.23184	17.9906	1.92536	-4.07896	62.4121	-0.618383	-14.0298	-4.37958	-0.402891	-7.76712
-0.774321	1.57083	-0.675907	19.6616	1.81456	-4.48314	61.0715	-0.52666	-14.4126	-3.1133	-0.78164	-7.29162
-0.857551	1.53516	-0.140783	21.1956	1.71975	-4.91861	59.4042	-0.583125	-14.768	-1.88497	-1.19338	-6.89679
-0.908208	1.50261	0.398924	22.581	1.65019	-5.37903	57.4343	-0.76229	-15.0479	-0.705205	-1.538	-6.71313
-0.934154	1.48729	0.965822	23.8132	1.60898	-5.86341	55.1813	-1.03487	-15.2181	0.388398	-1.72547	-6.80704
-0.947412	1.49738	1.55819	24.8942	1.59654	-6.36059	52.652	-1.37229	-15.2808	1.34483	-1.71933	-7.14606
-0.960052	1.52927	2.14571	25.8283	1.60933	-6.83395	49.8356	-1.73853	-15.2835	2.1196	-1.56416	-7.60892
-0.9799	1.56698	2.68694	26.6146	1.63629	-7.22532	46.7067	-2.08691	-15.3074	2.692	-1.37508	-8.04309
-1.00917	1.58688	3.1534	27.2446	1.65751	-7.47686	43.2382	-2.37309	-15.4406	3.07328	-1.29348	-8.33173
-1.04282	1.56518	3.54212	27.7036	1.64796	-7.55344	39.4199	-2.57415	-15.7419	3.29866	-1.4251	-8.4341
-1.07091	1.48477	3.87137	27.9796	1.58419	-7.45467	35.2707	-2.69896	-16.2112	3.40775	-1.79652	-8.38802
-1.08831	1.33875	4.16618	28.0811	1.45006	-7.21399	30.8452	-2.7816	-16.7911	3.43047	-2.35697	-8.28469
-1.09962	1.13041	4.44514	28.0441	1.24027	-6.88621	26.2346	-2.86027	-17.3946	3.38892	-3.01357	-8.22996
-1.11852	0.870432	4.71451	27.9278	0.96084	-6.52742	21.5603	-2.95584	-17.9495	3.30499	-3.68008	-8.30505
-1.16294	0.573932	4.96816	27.8004	0.628033	-6.17568	16.9619	-3.06358	-18.4258	3.19956	-4.30648	-8.53771
-1.24931	0.258087	5.19211	27.7236	0.264361	-5.8439	12.5817	-3.15915	-18.8339	3.0903	-4.88032	-8.89846
-1.38579	-0.0611147	5.37363	27.7402	-0.10822	-5.52877	8.55696	-3.21329	-19.2022	2.9959	-5.40788	-9.33307
-1.56332	-0.370483	5.5103	27.8644	-0.472192	-5.22518	5.01936	-3.20502	-19.5479	2.94234	-5.88612	-9.80028
-1.75791	-0.659531	5.61266	28.0849	-0.813593	-4.93497	2.09367	-3.12785	-19.8587	2.9599	-6.28586	-10.2795
-1.93971	-0.919499	5.70145	28.3714	-1.11896	-4.66759	-0.117434	-2.98996	-20.0912	3.06929	-6.55511	-10.7552
-2.07944	-1.1417	5.80208	28.6778	-1.37382	-4.44462	-1.55357	-2.81147	-20.188	3.26787	-6.64957	-11.1947
-2.15207	-1.31763	5.93843	28.9497	-1.56444	-4.30165	-2.20937	-2.62021	-20.1005	3.52279	-6.56245	-11.538
-2.14077	-1.44143	6.12453	29.1369	-1.67875	-4.27073	-2.13764	-2.4472	-19.8176	3.77354	-6.33401	-11.7099

## Sheet: loose sd
Pelvic Tilt	Pelvic Ob.	Pelvic Rot.	Hip Sagittal	Hip Frontal	Hip Trans.	Knee Sagittal	Knee Frontal	Knee Trans.	Ankle Sagittal	Ankle Frontal	Ankle Trans.
1.99117	1.09907	2.54546	2.7985	2.0212	3.48945	2.44458	2.43444	5.14579	3.34056	2.43251	3.63705
1.9706	1.15664	2.57544	2.89272	2.12147	3.44585	2.63994	2.38303	4.99301	3.37234	2.53475	3.59363
1.96959	1.24829	2.60215	3.00642	2.26264	3.40423	2.86745	2.36175	4.86896	3.41277	2.67133	3.56629
1.99368	1.35991	2.6277	3.1368	2.42775	3.38077	3.07276	2.38086	4.78478	3.43703	2.78053	3.54739
2.04173	1.472	2.65533	3.28111	2.58944	3.37717	3.23635	2.43653	4.7349	3.4449	2.83729	3.55415
2.10726	1.5697	2.68731	3.43666	2.72029	3.38723	3.37605	2.51457	4.71134	3.46123	2.85887	3.63333
2.18026	1.64799	2.72273	3.59915	2.80323	3.40343	3.5254	2.60053	4.71339	3.49019	2.87948	3.82499
2.25257	1.71116	2.75779	3.76233	2.83724	3.41901	3.71181	2.68691	4.74229	3.48281	2.91996	4.11291
2.3234	1.76829	2.78951	3.91886	2.83751	3.43329	3.94514	2.77469	4.79274	3.3714	2.97483	4.42051
2.40225	1.82855	2.81787	4.06425	2.82674	3.4524	4.21337	2.86801	4.85579	3.13799	3.02005	4.65618
2.50135	1.89877	2.84358	4.19751	2.82105	3.47977	4.48654	2.9634	4.92166	2.85013	3.03322	4.75589
2.62193	1.98299	2.86762	4.31718	2.82557	3.50769	4.73078	3.04764	4.97528	2.62905	3.0093	4.70134
2.75143	2.08131	2.89073	4.4186	2.83689	3.52194	4.92195	3.10388	4.99729	2.56134	2.96081	4.52636
2.87278	2.18744	2.91224	4.49287	2.84877	3.5154	5.05346	3.12204	4.97747	2.62649	2.90734	4.3063
2.97162	2.28983	2.92908	4.52876	2.85788	3.49221	5.13719	3.10279	4.92257	2.73862	2.85929	4.11817
3.03922	2.37549	2.93671	4.52037	2.8675	3.4589	5.19648	3.05353	4.85152	2.83464	2.80944	4.00162
3.07473	2.43313	2.93126	4.47629	2.88658	3.41744	5.25357	2.98322	4.78566	2.89448	2.74278	3.96126
3.08258	2.45399	2.91204	4.41574	2.92108	3.36721	5.31709	2.89771	4.74175	2.91846	2.65566	3.98451
3.06749	2.43393	2.88338	4.35755	2.96777	3.30831	5.37831	2.80168	4.72457	2.91104	2.56444	4.05141
3.03426	2.37575	2.85277	4.31162	3.01523	3.24159	5.41784	2.7015	4.72349	2.87597	2.49472	4.14494
2.9911	2.28982	2.82624	4.2774	3.05225	3.17097	5.41677	2.60775	4.72455	2.81845	2.46501	4.25582
2.94848	2.19208	2.80615	4.24691	3.07641	3.10474	5.36753	2.53665	4.72612	2.75111	2.4815	4.37873
2.91124	2.09946	2.7934	4.20863	3.09475	3.05034	5.27789	2.50365	4.73687	2.69574	2.53893	4.5054
2.87383	2.02545	2.79163	4.15274	3.11811	3.00945	5.16615	2.5128	4.76378	2.67413	2.61918	4.61984
2.82409	1.97815	2.80805	4.07493	3.15461	2.97929	5.05358	2.55246	4.80415	2.6936	2.6954	4.69445
2.75069	1.96052	2.84968	3.97972	3.20684	2.9558	4.95969	2.60609	4.84498	2.74053	2.74379	4.69944
2.64635	1.97081	2.91888	3.87886	3.27333	2.93265	4.89906	2.66778	4.86808	2.79052	2.75467	4.62029
2.50997	2.00267	3.01244	3.78884	3.35057	2.90065	4.87547	2.74505	4.8606	2.82229	2.73938	4.46448
2.35017	2.04552	3.12393	3.7242	3.43264	2.85212	4.87695	2.84551	4.82408	2.82427	2.72525	4.26348
2.18479	2.08584	3.24287	3.68667	3.50947	2.78828	4.87868	2.96101	4.77305	2.79195	2.73069	4.05409
2.03593	2.10906	3.35265	3.66143	3.56578	2.72308	4.85304	3.06607	4.72851	2.72844	2.74083	3.86096
1.91989	2.10392	3.43444	3.62356	3.58419	2.67836	4.77691	3.1312	4.71483	2.65056	2.72087	3.69535
1.83867	2.06815	3.47648	3.54887	3.55395	2.66975	4.63453	3.14081	4.75256	2.59243	2.65396	3.56256
1.78315	2.00999	3.47915	3.4263	3.47686	2.702	4.42338	3.09858	4.84627	2.5885	2.56192	3.47372
1.74598	1.94342	3.45108	3.26812	3.36509	2.77752	4.16159	3.02075	4.98092	2.64412	2.49316	3.44258
1.72498	1.88164	3.40292	3.10291	3.23593	2.89556	3.88483	2.92726	5.12986	2.73495	2.48662	3.46159
1.71829	1.8334	3.34402	2.96034	3.10844	3.03988	3.63207	2.8352	5.26898	2.83533	2.53683	3.49621
1.72405	1.80301	3.28246	2.85817	3.00074	3.18084	3.42802	2.75606	5.38087	2.93648	2.59368	3.50564
1.74332	1.79183	3.22696	2.7977	2.92512	3.29516	3.27458	2.69653	5.44923	3.04117	2.60316	3.46955
1.77522	1.79846	3.18679	2.76722	2.88403	3.37659	3.15818	2.65808	5.46235	3.15393	2.54767	3.39418
1.81306	1.81867	3.16937	2.75258	2.87091	3.43198	3.06392	2.63643	5.42731	3.27732	2.4518	3.3055
1.84924	1.84638	3.17865	2.74608	2.8759	3.47041	2.98307	2.62485	5.37017	3.41063	2.3577	3.23657
1.88148	1.87472	3.21546	2.74758	2.89078	3.49933	2.91388	2.6186	5.32068	3.55178	2.28996	3.20947
1.91299	1.89694	3.2772	2.76106	2.90994	3.52662	2.85914	2.61725	5.29942	3.69865	2.24983	3.22651
1.94937	1.90773	3.35827	2.78903	2.92911	3.56029	2.82064	2.62232	5.31561	3.84851	2.23266	3.27361
1.99692	1.90491	3.45122	2.83037	2.94402	3.61045	2.79492	2.6328	5.36862	4.00021	2.23211	3.33201
2.05834	1.89036	3.54813	2.884	2.95113	3.68235	2.77333	2.64425	5.44698	4.15448	2.23828	3.38962
2.12672	1.8687	3.64291	2.94828	2.95021	3.77048	2.74703	2.65011	5.53203	4.31436	2.23793	3.4415
2.18831	1.84517	3.73215	3.01808	2.94652	3.86241	2.71206	2.6434	5.60601	4.48709	2.21992	3.48327
2.23368	1.82435	3.81373	3.08648	2.95007	3.94512	2.66977	2.619	5.659	4.68373	2.18318	3.5112
2.2617	1.80862	3.88368	3.14586	2.9711	4.01127	2.62483	2.57511	5.68939	4.91601	2.14396	3.52585
2.27477	1.79681	3.93525	3.18839	3.01485	4.05825	2.58357	2.51384	5.7	5.18794	2.1322	3.52999
2.27541	1.78457	3.96234	3.20907	3.07923	4.08278	2.55375	2.44153	5.69353	5.48752	2.17229	3.52401
2.26587	1.76673	3.96152	3.20954	3.15722	4.07953	2.54341	2.36886	5.67255	5.7829	2.2686	3.50247
2.24912	1.73892	3.93217	3.19897	3.23989	4.04614	2.55915	2.31159	5.64542	6.03221	2.4092	3.45772
2.22682	1.69927	3.8766	3.18951	3.31844	3.99299	2.60739	2.28778	5.63137	6.19927	2.57353	3.38935
2.19936	1.65057	3.80157	3.19308	3.38578	3.94608	2.69735	2.30951	5.65863	6.26329	2.73523	3.3051
2.16948	1.60218	3.71759	3.22106	3.43812	3.93664	2.83901	2.37673	5.75642	6.22106	2.86718	3.21278
2.14686	1.56944	3.63655	3.28558	3.47634	3.98408	3.0343	2.4792	5.94438	6.08333	2.95879	3.11434
2.14524	1.568	3.56973	3.39497	3.50547	4.0846	3.26934	2.60341	6.22057	5.87265	3.02727	3.00585
2.17763	1.60476	3.52486	3.55149	3.53191	4.2136	3.5178	2.73827	6.55394	5.61499	3.10832	2.88586
2.24758	1.67257	3.503	3.74651	3.55961	4.33646	3.75111	2.87944	6.88796	5.3291	3.24408	2.76631
2.34292	1.75623	3.49744	3.95815	3.58816	4.42145	3.95018	3.03255	7.15799	5.01862	3.47443	2.67432
2.43965	1.84131	3.49559	4.15643	3.61338	4.4508	4.11196	3.20732	7.31488	4.68637	3.8205	2.64063
2.51327	1.91688	3.48424	4.31397	3.62772	4.42391	4.24601	3.40145	7.33993	4.38439	4.26941	2.67304
2.55041	1.97416	3.4549	4.4194	3.62072	4.35062	4.36243	3.59243	7.24205	4.24412	4.77687	2.74227
2.55426	2.007	3.40633	4.48114	3.58397	4.23667	4.45798	3.74627	7.04374	4.38317	5.28374	2.80357
2.54153	2.01441	3.34323	4.51958	3.51914	4.07561	4.51592	3.83363	6.7722	4.74392	5.73418	2.83266
2.53106	2.00183	3.27319	4.55816	3.44043	3.85454	4.52167	3.8435	6.45952	5.12648	6.09345	2.83751
2.53625	1.97896	3.20345	4.61798	3.36596	3.56997	4.47613	3.78679	6.14184	5.36678	6.35512	2.84112
2.5644	1.95437	3.13672	4.71243	3.30367	3.24223	4.3932	3.68822	5.85508	5.41419	6.52765	2.85865
2.61529	1.9312	3.0691	4.83783	3.24466	2.91796	4.28772	3.5776	5.6246	5.29874	6.61278	2.88761
2.68353	1.90734	2.9939	4.97481	3.16926	2.65549	4.16825	3.4864	5.45448	5.07867	6.6032	2.91486
2.76364	1.87953	2.90855	5.10029	3.05937	2.49561	4.0406	3.44286	5.33685	4.81141	6.49848	2.93161
2.85056	1.84774	2.81688	5.19663	2.90922	2.43883	3.91643	3.45658	5.26579	4.54602	6.31726	2.93803
2.93848	1.81551	2.72551	5.25914	2.72989	2.45536	3.81617	3.51178	5.23275	4.3233	6.09179	2.93657
3.02152	1.78588	2.6388	5.30022	2.54524	2.51243	3.76466	3.58175	5.22256	4.17209	5.85035	2.93602
3.09326	1.75812	2.55656	5.34164	2.38145	2.58841	3.78299	3.64985	5.2246	4.10467	5.60367	2.95655
3.14563	1.72889	2.47364	5.39713	2.2574	2.67226	3.87881	3.71942	5.24287	4.10968	5.34467	3.01674
3.17376	1.69648	2.38386	5.46472	2.17926	2.75999	4.04097	3.80009	5.29143	4.15301	5.06655	3.12244
3.1804	1.66458	2.28893	5.5314	2.13958	2.8542	4.2435	3.8854	5.38324	4.18737	4.77732	3.28894
3.17278	1.6423	2.20547	5.58084	2.12019	2.95926	4.4562	3.94499	5.52606	4.16834	4.50167	3.56192
3.15444	1.63896	2.16088	5.59987	2.09835	3.07404	4.65602	3.93917	5.72381	4.07464	4.26994	3.97635
3.12253	1.65749	2.17822	5.58226	2.05498	3.19467	4.83436	3.84404	5.96893	3.91646	4.10055	4.49022
3.07355	1.69157	2.26083	5.52874	1.98193	3.3234	4.9945	3.66743	6.22752	3.72561	3.9867	4.98687
3.0112	1.72875	2.39136	5.44786	1.88504	3.46963	5.14324	3.44751	6.44903	3.53323	3.90401	5.34876
2.94463	1.75634	2.54442	5.35296	1.77997	3.6342	5.28328	3.22926	6.59767	3.34887	3.83303	5.5142
2.87888	1.76517	2.6967	5.25188	1.68475	3.79679	5.4101	3.03131	6.67217	3.16445	3.76706	5.48208
2.81279	1.75184	2.82864	5.1417	1.616	3.92795	5.51152	2.84377	6.69766	2.97726	3.69932	5.28976
2.74287	1.71999	2.92403	5.01068	1.58751	4.01273	5.56698	2.65719	6.69714	2.80735	3.61916	4.99068
2.66905	1.67916	2.97379	4.84438	1.60634	4.06641	5.55127	2.48319	6.67539	2.69373	3.53041	4.64067
2.59389	1.64045	2.98197	4.63127	1.66966	4.11747	5.44304	2.34246	6.62813	2.66723	3.45987	4.29317
2.5196	1.61133	2.9678	4.37034	1.76727	4.17877	5.22975	2.24644	6.55343	2.73032	3.42638	3.997
2.44903	1.59312	2.95723	4.07768	1.88587	4.23703	4.90784	2.19791	6.45483	2.86481	3.41309	3.78818
2.38898	1.58161	2.96629	3.78782	2.01151	4.26694	4.48594	2.19576	6.34009	3.04291	3.38463	3.67619
2.35016	1.57052	2.9911	3.53924	2.13246	4.25662	3.99099	2.23171	6.22541	3.22982	3.32663	3.64512
2.33686	1.5556	3.01558	3.35262	2.24257	4.2178	3.47255	2.28767	6.13232	3.3921	3.2626	3.67528
2.33896	1.53752	3.02876	3.22871	2.34288	4.17341	3.00489	2.34253	6.0679	3.51077	3.23532	3.75927
2.33754	1.5218	3.03265	3.15576	2.4408	4.13164	2.67634	2.38174	6.01495	3.58655	3.26145	3.8899
2.31267	1.51671	3.03654	3.10982	2.54634	4.07901	2.5505	2.4002	5.95297	3.63254	3.32071	4.04208
2.26283	1.53007	3.04987	3.07935	2.66761	4.00926	2.62271	2.39899	5.88551	3.66285	3.38239	4.18322
