# Supplementary material for: The inter-trial and inter-session reliability of Theia3D-derived markerless gait analysis in tight versus loose clothing
Source: PeerJ. 2025 Jan 2;13:e18613. doi: 10.7717/peerj.18613 (PMC11700486; doi:10.7717/peerj.18613)
Supplement: Supplemental Information 3 [file peerj-13-18613-s003.xlsx]

## Sheet: Sheet1
TRIAL	1	1	2	2	3	3	4	4	5	5	TRIAL	1	1	2	2	3	3	4	4	5	5
Loose Sess 1	RSH	RTH	RSH	RTH	RSH	RTH	RSH	RTH	RSH	RTH	Loose Sess 2	RSH	RTH	RSH	RTH	RSH	RTH	RSH	RTH	RSH	RTH
SEG	RSH_SegLength_MEAN	RTH_SegLength_MEAN	RSH_SegLength_MEAN	RTH_SegLength_MEAN	RSH_SegLength_MEAN	RTH_SegLength_MEAN	RSH_SegLength_MEAN	RTH_SegLength_MEAN	RSH_SegLength_MEAN	RTH_SegLength_MEAN	SEG	RSH_SegLength_MEAN	RTH_SegLength_MEAN	RSH_SegLength_MEAN	RTH_SegLength_MEAN	RSH_SegLength_MEAN	RTH_SegLength_MEAN	RSH_SegLength_MEAN	RTH_SegLength_MEAN	RSH_SegLength_MEAN	RTH_SegLength_MEAN
P006	0.391116	0.381362	0.390459	0.379839	0.394613	0.380767	0.390113	0.388515	0.39262	0.385405	P006	0.389264	0.39194	0.39042	0.387466	0.393463	0.389976	0.387672	0.393424	0.387688	0.391841
P007	0.394809	0.395474	0.399356	0.394498	0.393068	0.383581	0.389517	0.385031	0.390455	0.384911	P007	0.389445	0.379332	0.3885	0.378641	0.389505	0.386394	0.388213	0.383723	0.388252	0.374394
P008	0.381815	0.381814	0.384439	0.382486	0.382273	0.382701	0.382011	0.381319	0.385991	0.384967	P008	0.396376	0.395409	0.396531	0.388325	0.396368	0.387661	0.394332	0.386789	0.39398	0.389995
P009	0.392814	0.397118	0.389022	0.390686	0.389252	0.394788	0.39207	0.390589	0.391514	0.394034	P009	0.384868	0.373447	0.386819	0.375979	0.387233	0.376696	0.383492	0.374188	0.384985	0.372021
P010	0.400574	0.381645	0.398487	0.38115	0.400494	0.38282	0.395736	0.381731	0.401128	0.383102	P010	0.38534	0.370593	0.384925	0.374265	0.388282	0.376331	0.386881	0.374176	0.386396	0.375816
P012	0.412615	0.419336	0.411743	0.418481	0.407939	0.425125	0.409984	0.421801	0.410966	0.416974	P012	0.412762	0.423465	0.409926	0.427348	0.410422	0.424257	0.414718	0.418226	0.409575	0.425607
P013	0.384788	0.385424	0.386903	0.387017	0.384638	0.387968	0.385745	0.387181	0.383745	0.386818	P013	0.392568	0.37624	0.393304	0.375704	0.394144	0.379014	0.394464	0.377003	0.392912	0.37425
P015	0.369571	0.354041	0.365704	0.35735	0.368889	0.356134	0.369507	0.355175	0.364847	0.355899	P015	0.363411	0.376572	0.365882	0.376228	0.364096	0.377941	0.364929	0.376576	0.366563	0.375164
P016	0.39186	0.388993	0.391026	0.390382	0.392451	0.390836	0.391876	0.389883	0.390557	0.392281	P016	0.391419	0.406901	0.392788	0.403957	0.392914	0.406919	0.395382	0.401994	0.395168	0.403943
P017	0.389445	0.379332	0.3885	0.378641	0.389505	0.386394	0.388213	0.383723	0.388252	0.374394	P017	0.432025	0.396789	0.433326	0.395539	0.433833	0.393358	0.43646	0.390713	0.432015	0.405351
P018	0.389666	0.380716	0.392782	0.379863	0.391087	0.379405	0.394735	0.378457	0.39033	0.38027	P018	0.383622	0.385484	0.374218	0.383497	0.376779	0.383833	0.379115	0.386306	0.37595	0.38351
P019	0.422715	0.413652	0.421962	0.411929	0.423796	0.410551	0.425296	0.4089	0.427603	0.405629	P019	0.425693	0.402083	0.422073	0.401314	0.422299	0.402497	0.421254	0.404231	0.421851	0.403941
P021	0.387978	0.384741	0.383347	0.386339	0.385833	0.383967	0.384752	0.385382	0.383521	0.387193	P021	0.389889	0.383421	0.388858	0.387125	0.390846	0.38859	0.388378	0.386607	0.388985	0.38534
P022	0.450441	0.424155	0.447388	0.42675	0.448894	0.42519	0.450572	0.425129	0.448943	0.428281	P022	0.462789	0.447648	0.457345	0.445519	0.455772	0.447212	0.460552	0.4468	0.457994	0.447177
P023	0.405466	0.382885	0.406286	0.385075	0.408369	0.384103	0.407406	0.382139	0.409362	0.386484	P023	0.410705	0.380438	0.412156	0.376268	0.411608	0.375217	0.41108	0.376472	0.410652	0.377626
P024	0.423907	0.429414	0.427216	0.423947	0.419409	0.433461	0.417682	0.430721	0.420341	0.429824	P024	0.434204	0.431168	0.43945	0.428767	0.445324	0.426877	0.4403	0.426749	0.443423	0.428362
P026	0.40111	0.407294	0.402424	0.406259	0.401114	0.404236	0.405503	0.402255	0.401804	0.407257	P026	0.414228	0.398795	0.412445	0.398518	0.41536	0.394242	0.419942	0.388825	0.415207	0.401306
P027	0.436777	0.418367	0.439048	0.413525	0.439196	0.412922	0.435515	0.413624	0.438194	0.41619	P027	0.437524	0.41307	0.436897	0.414503	0.434894	0.412414	0.433566	0.415389	0.436493	0.413679
P028	0.409516	0.389117	0.41137	0.391449	0.41055	0.391654	0.40989	0.388503	0.408222	0.392886	P028	0.421631	0.391451	0.423567	0.389448	0.425807	0.38688	0.424912	0.38751	0.426522	0.383404
P029	0.371363	0.361274	0.370617	0.361831	0.376931	0.353785	0.374845	0.354779	0.373204	0.359104	P029	0.372117	0.365884	0.376365	0.361558	0.375859	0.364989	0.375846	0.364908	0.374006	0.366358
P030	0.395913	0.356338	0.395491	0.356463	0.393531	0.355599	0.394703	0.359525	0.394812	0.358382	P030	0.380152	0.356556	0.382727	0.354465	0.38609	0.355895	0.382146	0.353838	0.388359	0.356775
P031	0.374774	0.407721	0.376051	0.405625	0.376173	0.405271	0.365486	0.401251	0.369157	0.405322	P031	0.387317	0.393189	0.403328	0.383917	0.390753	0.388387	0.390564	0.391608	0.397361	0.390644
TRIAL	1	1	2	2	3	3	4	4	5	5	TRIAL	1	1	2	2	3	3	4	4	5	5
Tight Sess1	RSH	RTH	RSH	RTH	RSH	RTH	RSH	RTH	RSH	RTH	Tight Sess2	RSH	RTH	RSH	RTH	RSH	RTH	RSH	RTH	RSH	RTH
SEG	RSH_SegLength_MEAN	RTH_SegLength_MEAN	RSH_SegLength_MEAN	RTH_SegLength_MEAN	RSH_SegLength_MEAN	RTH_SegLength_MEAN	RSH_SegLength_MEAN	RTH_SegLength_MEAN	RSH_SegLength_MEAN	RTH_SegLength_MEAN	SEG	RSH_SegLength_MEAN	RTH_SegLength_MEAN	RSH_SegLength_MEAN	RTH_SegLength_MEAN	RSH_SegLength_MEAN	RTH_SegLength_MEAN	RSH_SegLength_MEAN	RTH_SegLength_MEAN	RSH_SegLength_MEAN	RTH_SegLength_MEAN
P006	0.399825	0.387594	0.398878	0.388536	0.399294	0.389804	0.399776	0.388702	0.399305	0.388702	P006	0.400474	0.43102	0.399942	0.432432	0.400141	0.431002	0.400259	0.432086	0.398087	0.432636
P007	0.401431	0.40469	0.401115	0.406132	0.401787	0.404375	0.402674	0.40457	0.402531	0.405348	P007	0.39529	0.424534	0.392772	0.427775	0.393946	0.427078	0.395478	0.426381	0.392581	0.431111
P008	0.395612	0.402029	0.395406	0.40328	0.393904	0.404369	0.395222	0.402971	0.394838	0.403648	P008	0.400861	0.438279	0.401702	0.439687	0.402178	0.438411	0.400692	0.438934	0.400749	0.443988
P009	0.404392	0.421697	0.401988	0.421168	0.40383	0.422463	0.403133	0.422482	0.404637	0.42338	P009	0.399844	0.422673	0.400668	0.426909	0.399005	0.425788	0.40135	0.425789	0.397424	0.424675
P010	0.405574	0.377242	0.405191	0.380647	0.403086	0.38254	0.404652	0.381675	0.404459	0.381939	P010	0.402465	0.41705	0.400759	0.416726	0.401131	0.417488	0.401275	0.416409	0.400899	0.41806
P012	0.427004	0.421836	0.427277	0.421007	0.426134	0.421546	0.425857	0.420981	0.425973	0.420814	P012	0.427871	0.476973	0.427537	0.475922	0.427822	0.477133	0.427313	0.477466	0.426914	0.477792
P013	0.410218	0.378441	0.411341	0.376878	0.410402	0.379536	0.411238	0.377636	0.413031	0.377219	P013	0.413108	0.419497	0.413686	0.4213	0.414618	0.421448	0.414636	0.420207	0.413881	0.421013
P015	0.369406	0.385722	0.36777	0.385995	0.368045	0.383924	0.365625	0.385671	0.365697	0.385908	P015	0.362754	0.389346	0.360591	0.388675	0.360598	0.389336	0.363926	0.386682	0.36155	0.388542
P016	0.382938	0.420189	0.383837	0.42028	0.383216	0.419571	0.384216	0.417931	0.382407	0.419202	P016	0.379994	0.430162	0.381762	0.433196	0.378985	0.431137	0.38005	0.430759	0.379175	0.431183
P017	0.439925	0.393996	0.442679	0.391765	0.438276	0.393058	0.439428	0.39677	0.441571	0.391778	P017	0.441931	0.440572	0.440215	0.441976	0.440898	0.442698	0.441978	0.440609
P018	0.377551	0.425896	0.374011	0.426405	0.379006	0.426507	0.378177	0.426175	0.377329	0.425669	P018	0.382002	0.444031	0.38012	0.443906	0.381551	0.444358	0.379873	0.444652	0.381012	0.443509
P019	0.434017	0.416632	0.435176	0.414701	0.43568	0.416017	0.436006	0.416321	0.434598	0.417214	P019	0.439773	0.450681	0.441083	0.450718	0.438386	0.452538	0.439356	0.451797	0.439835	0.451459
P021	0.397255	0.392827	0.395617	0.393062	0.399901	0.391528	0.396151	0.39271	0.401062	0.39322	P021	0.396506	0.431438	0.399023	0.432591	0.398971	0.431332	0.398439	0.431722	0.397464	0.432824
P022	0.477376	0.437775	0.477643	0.43632	0.477025	0.435877	0.47667	0.436391	0.477544	0.434106	P022	0.476716	0.482117	0.474461	0.478696	0.475146	0.478177	0.475697	0.47927	0.477039	0.478434
P023	0.404866	0.390025	0.40425	0.394733	0.408003	0.393366	0.405785	0.393591	0.402659	0.39264	P023	0.413886	0.418354	0.412662	0.420677	0.413424	0.41853	0.414482	0.418125	0.414493	0.419333
P024	0.450749	0.45169	0.450504	0.454133	0.450135	0.450965	0.450116	0.450792	0.450558	0.450593	P024	0.449573	0.476958	0.451059	0.478231	0.450868	0.477746	0.451128	0.478198	0.449661	0.47633
P026	0.416497	0.440107	0.418209	0.438815	0.41706	0.439163	0.416323	0.439039	0.417255	0.440752	P026	0.408317	0.435373	0.409308	0.434409	0.409292	0.435865	0.409859	0.4352	0.40769	0.435457
P027	0.452846	0.454046	0.452452	0.454777	0.452026	0.451954	0.452234	0.452446	0.450727	0.453847	P027	0.450885	0.472499	0.450248	0.473079	0.450267	0.472053	0.451552	0.471343	0.451455	0.472488
P028	0.428036	0.407924	0.429381	0.408379	0.428612	0.407479	0.426105	0.409427	0.423072	0.408276	P028	0.430038	0.448451	0.430136	0.447471	0.428869	0.447083	0.43136	0.446791	0.429023	0.447292
P029	0.388852	0.369008	0.385729	0.368691	0.38658	0.368389	0.382196	0.36995	0.386942	0.368704	P029	0.391378	0.396025	0.391385	0.397037	0.3882	0.398744	0.390395	0.397749	0.388442	0.398044
P030	0.397444	0.384223	0.398254	0.384329	0.398811	0.386068	0.398112	0.383555	0.397198	0.382308	P030	0.393431	0.403372	0.394823	0.404002	0.39571	0.403731	0.395079	0.403329	0.393607	0.404822
P031	0.424718	0.403486	0.424751	0.406002	0.423834	0.402783	0.423094	0.402247	0.424288	0.40501	P031	0.42109	0.436918	0.421329	0.43877	0.420954	0.43777	0.421328	0.437271	0.420848	0.43858
MEAN	Loose Sess1		Loose Sess2			Tight Sess1		Tight Sess2			MEAN DIF	Loose Sess1Sess2		Tight Sess1 Sess2
Metre	SHANK	THIGH	SHANK	THIGH		SHANK	THIGH	SHANK	THIGH		Metre	SHANK	THIGH	SHANK	THIGH
P006	0.391784	0.383178	0.389701	0.390929		0.399416	0.388668	0.399781	0.431835		P006	0.0020828	-0.0077518	-0.000365	-0.0431676
P007	0.393441	0.388699	0.388783	0.380497		0.401908	0.405023	0.394013	0.427376		P007	0.004658	0.0082022	0.0078942	-0.0223528
P008	0.383306	0.382657	0.395517	0.389636		0.394996	0.403259	0.401236	0.43986		P008	-0.0122116	-0.0069784	-0.00624	-0.0366004
P009	0.390934	0.393443	0.385479	0.374466		0.403596	0.422238	0.399658	0.425167		P009	0.005455	0.0189768	0.0039378	-0.0029288
P010	0.399284	0.38209	0.386365	0.374236		0.404592	0.380809	0.401306	0.417147		P010	0.012919	0.0078534	0.0032866	-0.036338
P012	0.410649	0.420343	0.411481	0.423781		0.426449	0.421237	0.427491	0.477057		P012	-0.0008312	-0.0034372	-0.0010424	-0.0558204
P013	0.385164	0.386882	0.393478	0.376442		0.411246	0.377942	0.413986	0.420693		P013	-0.0083146	0.0104394	-0.0027398	-0.042751
P015	0.367704	0.35572	0.364976	0.376496		0.367309	0.385444	0.361884	0.388516		P015	0.0027274	-0.0207764	0.0054248	-0.0030722
P016	0.391554	0.390475	0.393534	0.404743		0.383323	0.419435	0.379993	0.431287		P016	-0.0019802	-0.0142678	0.0033296	-0.0118528
P017	0.388783	0.380497	0.433532	0.39635		0.440376	0.393473	0.441256	0.441464		P017	-0.0447488	-0.0158532	-0.0008797	-0.0479904
P018	0.39172	0.379742	0.377937	0.384526		0.377215	0.42613	0.380912	0.444091		P018	0.0137832	-0.0047838	-0.0036968	-0.0179608
P019	0.424274	0.410132	0.422634	0.402813		0.435095	0.416177	0.439687	0.451439		P019	0.0016404	0.007319	-0.0045912	-0.0352616
P021	0.385086	0.385524	0.389391	0.386217		0.397997	0.392669	0.398081	0.431981		P021	-0.004305	-0.0006922	-8.34e-05	-0.039312
P022	0.449248	0.425901	0.45889	0.446871		0.477252	0.436094	0.475812	0.479339		P022	-0.0096428	-0.0209702	0.0014398	-0.043245
P023	0.407378	0.384137	0.41124	0.377204		0.405113	0.392871	0.413789	0.419004		P023	-0.0038624	0.006933	-0.0086768	-0.0261328
P024	0.421711	0.429473	0.44054	0.428385		0.450412	0.451635	0.450458	0.477493		P024	-0.0188292	0.0010888	-4.54e-05	-0.025858
P026	0.402391	0.40546	0.415436	0.396337		0.417069	0.439575	0.408893	0.435261		P026	-0.0130454	0.009123	0.0081756	0.0043144
P027	0.437746	0.414926	0.435875	0.413811		0.452057	0.453414	0.450881	0.472292		P027	0.0018712	0.0011146	0.0011756	-0.0188784
P028	0.40991	0.390722	0.424488	0.387739		0.427041	0.408297	0.429885	0.447418		P028	-0.0145782	0.0029832	-0.002844	-0.0391206
P029	0.373392	0.358155	0.374839	0.364739		0.38606	0.368948	0.38996	0.39752		P029	-0.0014466	-0.0065848	-0.0039002	-0.0285714
P030	0.39489	0.357261	0.383895	0.355506		0.397964	0.384097	0.39453	0.403851		P030	0.0109952	0.0017556	0.0034338	-0.0197546
P031	0.372328	0.405038	0.393865	0.389549		0.424137	0.403906	0.42111	0.437862		P031	-0.0215364	0.015489	0.0030272	-0.0339562
Intersession Different	Loose Sess1Sess2		Tight Sess1 Sess2			Diff in %	Loose Sess1Sess2		Tight Sess1 Sess2
mm	SHANK	THIGH	SHANK	THIGH		%	SHANK	THIGH	SHANK	THIGH
P006	2.0828	7.7518	0.365	43.1676		P006	0.531619	2.02303	0.0936615	11.0423
P007	4.658	8.2022	7.8942	22.3528		P007	1.18391	2.11017	2.03049	5.87464
P008	12.2116	6.9784	6.24	36.6004		P008	3.18586	1.82367	1.57768	9.39349
P009	5.455	18.9768	3.9378	2.9288		P009	1.39537	4.82327	1.02153	0.782127
P010	12.919	7.8534	3.2866	36.338		P010	3.23554	2.05538	0.850647	9.70991
P012	0.8312	3.4372	1.0424	55.8204		P012	0.202411	0.817712	0.253329	13.172
P013	8.3146	10.4394	2.7398	42.751		P013	2.15872	2.69834	0.696303	11.3566
P015	2.7274	20.7764	5.4248	3.0722		P015	0.741739	5.84066	1.48634	0.815998
P016	1.9802	14.2678	3.3296	11.8528		P016	0.505728	3.65396	0.846076	2.92848
P017	44.7488	15.8532	0.8797	47.9904		P017	11.51	4.16645	0.202915	12.1081
P018	13.7832	4.7838	3.6968	17.9608		P018	3.51864	1.25975	0.978153	4.67089
P019	1.6404	7.319	4.5912	35.2616		P019	0.386637	1.78455	1.08633	8.75383
P021	4.305	0.6922	0.0834	39.312		P021	1.11793	0.179548	0.021418	10.1787
P022	9.6428	20.9702	1.4398	43.245		P022	2.14643	4.92373	0.313757	9.67729
P023	3.8624	6.933	8.6768	26.1328		P023	0.948113	1.80482	2.10991	6.92802
P024	18.8292	1.0888	0.0454	25.858		P024	4.46495	0.25352	0.0103055	6.03616
P026	13.0454	9.123	8.1756	4.3144		P026	3.24197	2.25004	1.96795	1.08857
P027	1.8712	1.1146	1.1756	18.8784		P027	0.427463	0.268626	0.26971	4.56208
P028	14.5782	2.9832	2.844	39.1206		P028	3.55644	0.76351	0.669984	10.0894
P029	1.4466	6.5848	3.9002	28.5714		P029	0.387421	1.83854	1.0405	7.83337
P030	10.9952	1.7556	3.4338	19.7546		P030	2.78437	0.491405	0.894464	5.55676
P031	21.5364	15.489	3.0272	33.9562		P031	5.78425	3.82409	0.768589	8.7168
Mean	9.61203	8.78972	3.46499	28.8746		Mean	2.42798	2.25703	0.872275	7.33071
SD	9.92712	6.36643	2.56381	14.935		SD	2.54921	1.63871	0.644376	3.7019
